# Supplementary material for: Identification of Candidate Genes Associated With Tolerance to Apple Replant Disease by Genome-Wide Transcriptome Analysis
Source: Front Microbiol. 2022 May 9;13:888908. doi: 10.3389/fmicb.2022.888908 (PMC9125221; doi:10.3389/fmicb.2022.888908)
Supplement: Supplementary Table 1 — KEGG input and output data for susceptible rootstock ‘M9’ and the ARD tolerant wild apple accession M. ×robusta 5 (Mr5). [file Table_1.XLSX]

## Sheet: Mr5_input
Mr5 input data for KEEG analysis
LOC	gene id	mRNA	Analogue to	Symbols (DAVIDtool) Bold= used for Primervalidation	log2FC Mr5 (ARD/уARD)
103438473	1039884940	XM_008377014.2	AT3G63440	CKX6	-2.89522
103451550	1039843693	XM_008390961.2	AT3G62930	AT3G62930	-2.84546
103453933	1039845706	XR_001792083.1	AT5G03720	HSFA3	-2.43247
103455222	1039825489	XM_008394846.2	AT3G18830	PMT5	-2.41711
103413395	1039909534	XM_008351861.2	AT1G03020	AT1G03020	-2.32603
103445609	1039830951	XM_008384622.2	AT2G20470	AT2G20470	-2.29575
103432041	1039934790	XM_008370208.2	AT3G28345	ABCB15	-2.27464
103407916	658019323	XM_008346792.1	AT5G55630	KCO1	-2.2113
103401371	1039850313	XM_008340087.2	AT4G34410	RRTF1	-2.16083
103448931	1039834751	XR_001791318.1	AT3G22830	HSFA6B	-2.12049
103455848	658309805	NM_001293949.1	AT4G08150	KNAT1	-2.06825
103408074	1039899568	XM_017324901.1	AT3G22830	HSFA6B	-2.06786
103441386	1039891475	XM_017333931.1		MIEL1	-2.06371
103421242	1039920188	XM_017328343.1	AT5G25560	MIEL1-like	-2.05977
103450982	1039840085	XR_001791642.1		NA	-2.01626
103449107	1039866783	XM_008388392.2	AT3G24500	MBF1C	-1.9874
103405539	1039861563	XM_008344552.2	AT2G42610	LSH10	-1.94253
103436609	1039878217	XM_017332127.1	AT1G02170	MC1	-1.92475
103445420	1039834208	XM_008384425.2	AT4G30110	HMA2	-1.91948
103422828	1039922479	XM_017328830.1	AT3G45780	PHOT1	-1.86835
103407312	1039898110	XM_008346241.2	AT2G21250	AT2G21250	-1.85886
103447870	1039836154	XM_008387075.2	AT2G28470	BGAL8	-1.85057
103430004	1039932094	XM_008368138.2	AT2G28470	BGAL8	-1.81134
103421250	658043708	XM_008359276.1	AT4G32630	AT4G32630	-1.77334
103456391	1039853817	XR_001785992.1	AT3G06240	AT3G06240	-1.76776
103439070	1039886819	XM_008377623.2	AT3G62950	AT3G62950	-1.76699
103450502	1039840258	XM_008389866.2		DIR1	-1.76557
103426655	1039927627	XM_008364739.2	AT4G15450	AT4G15450	-1.74413
103431687	1039934317	XM_008369867.2	AT4G00335	RHB1A	-1.73441
103449122	1039836712	XM_008388406.2	AT1G03020	AT1G03020	-1.72023
103418043	1039916139	XM_008356195.2	AT4G15450	AT4G16260	-1.69671
103416294	1039914055	XM_008354554.2	AT3G19508	AT3G19508	-1.68522
103413760	1039909969	XM_008352199.2	AT1G52700	AT1G52700	-1.64541
103425376	1039925924	XM_017329578.1	AT3G47090	AT3G47090	-1.62715
103418491	1039916797	XM_008356614.2	AT2G21250	AT2G21250	-1.61823
103420976	1039919842	XM_017328259.1		At5g10770	-1.61283
103436196	1039877658	XM_008374623.2	AT5G42340	PUB15	-1.60569
103430815	1039933156	XM_008368956.2	AT3G23600	AT3G23600	-1.60079
103414007	1039910431	XM_008352427.2		NA	-1.59151
103407947	1039899345	XM_008346825.2	AT4G26910	AT4G26910	-1.59084
103440436	1039889905	XM_008379121.2	AT2G23790	AT2G23790	-1.56361
103448125	1039866637	XM_008387388.2		At3g14460	-1.55025
103436134	1039880624	XM_008374557.2	AT2G44710	AT2G44710	-1.53088
103443642	1039894098	XM_008382529.2		AGP9	-1.52631
103404713	1039862339	XM_008343660.2	AT5G38450	CYP735A1	-1.51924
103437868	1039884336	XM_017333024.1	AT5G07920	DGK1	-1.51195
103412690	1039908620	XR_525761.2	AT3G21560	UGT84A2	-1.50639
103436645	1039878496	XM_008375087.2	AT1G33440	AT1G33440	-1.50524
103439072	1039886564	XM_008377625.2	AT2G47880	AT2G47880	-1.48508
103440184	1039890627	XM_017333820.1	AT3G14940	PPC3	-1.47953
103418298	1039916462	XM_008356431.2	AT4G36470	AT4G36470	-1.47584
103419108	1039870959	XM_008357235.2	loc_os03g1592012003.m35599proteinexpressedproteinnooriginaldescription'	NA	-1.47157
103442303	1039895555	XM_017334724.1	AT3G28345	AT3G28345	-1.46513
103433133	1039874816	XM_008371365.2	AT5G13870	XTH5	-1.46218
103449069	1039836221	XM_008388342.2		GDU5	-1.4577
103409167	1039901747	XR_525098.2	AT1G77120	ADH1	-1.43565
103420305	1039872605	XM_008358368.2	loc_os03g1592012003.m35599proteinexpressedproteinnooriginaldescription'	NA	-1.41776
103433107	1039874870	XR_529084.2	AT5G03420	AT5G03420	-1.39911
103453244	1039844606	XR_531830.2		NA	-1.37165
103407967	1039899394	XM_008346839.2	AT5G54660	AT5G54660	-1.34759
103443180	1039828741	XM_008381983.2	AT1G01490	AT1G01490	-1.33574
103456239	1039848301	XM_008395919.2		NA	-1.33018
103409227	1039901851	XM_008348040.2		NA	-1.32118
103452494	1039866721	XR_001785760.1	AT5G36930	AT5G36930	-1.31751
103454083	1039847073	XM_008393669.2	AT2G18050	HIS1-3	-1.30337
103448977	1039837076	XM_008388247.2	AT3G22550	DUF581	-1.29903
103427376	1039928665	XM_008365431.2	AT3G63350	HSFA7B	-1.28268
103439715	657969597	XM_008378301.1	AT5G52020	AT5G52020	-1.27976
103442308	1039894640	XM_017334564.1	AT1G59650	CW14	-1.26525
103408131	1039899745	XM_008346997.2	AT3G16770	EBP	-1.23431
103411051	1039905400	XR_001786990.1	AT3G49670	BAM2	-1.2174
103446591	1039834193	XM_008385721.2		HBP-1b	-1.20851
103445616	657981651	XM_008384630.1	AT1G04430	AT1G04430	-1.20788
103450146	1039838622	XM_008389456.2	AT3G09600	RVE8	-1.19491
103439474	1039827640	XM_008378039.2	AT5G62350	AT5G62350	-1.18695
103419436	1039917929	XM_008357538.2	AT1G56600	GolS2	-1.18683
103433279	1039875064	XM_017331595.1	AT2G37150	AT2G37150	-1.18634
103413292	1039909458	XM_008351767.2	AT1G53020	UBC26	-1.17521
103450725	1039840806	XM_008390096.2	AT2G38400	AGT3	-1.17453
103455011	1039847446	XR_001785629.1		NA	-1.17026
103422025	1039921357	XM_008360065.2	AT3G43660	AT3G43660	-1.16911
103432411	1039874502	XM_008370595.2	AT3G63280	NEK4	-1.16596
103442289	1039893913	XM_008381068.2	AT3G28210	AT3G28210	-1.16382
103424737	1039925058	XM_008362831.2		NA	-1.15976
103420417	1039919154	XM_008358477.2	AT3G17800	AT3G17800	-1.15891
103400424	1039848089	XM_008339072.2	AT5G20150	SPX1	-1.15715
103428765	1039930491	XM_008366884.2	AT4G24240	WRKY7	-1.15104
103426485	1039927370	XM_008364564.2	AT1G01490	AT1G01490	-1.15009
103416477	1039914391	XM_008354719.2		CYP749A22	-1.14658
103436766	1039884311	XM_017333021.1	AT4G19420	PAE8	-1.14331
103440802	1039892113	XR_530151.2	AT5G27730	AT5G27730	-1.13968
103419065	1039917493	XR_526869.2	AT1G53590	NTMC2T6.1	-1.13909
103456090	1039852794	XM_008395720.2		NA	-1.13803
103415754	1039913366	XM_008354048.2	AT2G26650	AKT1	-1.13294
103438689	1039888500	XM_008377237.2		NA	-1.13248
103432419	1039874518	XM_008370608.2	AT3G63210	AT3G63210	-1.13038
103434734	1039879543	XM_017332410.1	AT1G61210	DWA3	-1.13026
103449452	658309821	NM_001293958.1	AT5G03840	TFL1	-1.12864
103454884	1039867378	XR_001786111.1	AT5G17680	AT5G17680	-1.12553
103411254	1039906055	XM_008349900.2	AT2G20900	DGK5	-1.12519
103445747	1039832650	XM_008384770.2	AT1G19800	ABCI14	-1.11593
103405751	1039865227	XM_008344775.2	AT5G66590	AT5G66590	-1.11232
103421170	658043577	XM_008359204.1	AT4G31290	AT4G31290	-1.1024
103441047	1039891136	XR_530177.2	AT4G32850	nPAP	-1.09875
103451604	1039842304	XM_008391017.2		NA	-1.0969
103401729	1039852529	XM_008340450.2	AT1G77380	AAP3	-1.08763
103428379	1039929979	XM_008366486.2	AT3G08040	FRD3	-1.07939
103420935	1039919835	XM_008358971.2	AT5G36930	AT5G36930	-1.07655
103405110	1039865392	XM_008344075.2		NA	-1.0648
103427856	1039929315	XM_008365939.2	AT1G28330	DYL1	-1.06088
103419818	657952152	XM_008357912.1	AT5G01740	AT5G01740	-1.05925
103451734	1039842593	XM_008391155.2	AT2G03800	GEK1	-1.05094
103448302	1039866661	XM_008387554.2	AT1G15410	AT1G15410	-1.04878
103439347	1039827602	XM_017333748.1		TPPA	-1.0471
103444686	1039834081	XM_017335316.1	AT5G17680	AT5G17680	-1.04187
103400538	1039849367	XM_008339192.2	AT2G26650	AKT1	-1.04106
103411923	1039907139	XM_017325908.1	AT5G17680	AT5G17680	-1.03895
103401483	1039851868	XM_008340193.2	AT4G33910	AT4G33910	-1.03152
103417731	1039870582	XM_008355910.2	AT5G10860	CBSX3	-1.02721
103456343	1039853262	XM_017323343.1	AT1G05690	BT3	-1.0248
103434821	1039879590	XM_008373176.2	AT1G28330	DYL1	-1.02341
103424962	1039925349	XM_017329453.1		RPS6	-1.02299
103431959	1039826175	XM_008370161.2	AT2G39220	PLP6	-1.0223
103415456	1039913068	XM_017326878.1	AT3G16500	PAP1	-1.01167
103451909	1039842098	XM_008391350.2	AT1G59940	ARR3	-0.999786
103416870	1039914737	XM_017327202.1	AT3G07040	RPM1	-0.996064
103419497	1039918024	XM_008357597.2	AT4G14746	AT4G14746	0.995099
103399998	1039848427	XR_001785679.1	AT1G01170	AT1G01170	0.999085
103452100	1039844461	XM_008391588.2	AT1G24360	AT1G24360	1.00067
103453778	1039844178	XM_008393354.2		TBC1	1.0014
103454632	1039845840	XM_008394226.2	AT1G64300	AT1G64300	1.00214
103452577	1039865571	XM_017335359.1	AT1G11330	AT1G11330	1.0023
103433997	661567346	NM_001294351.1	AT5G27320	GID1C	1.00265
103434807	1039826645	XM_008373161.2	AT2G28710	ZAT12	1.00443
103420322	1039919020	XM_008358380.2	AT1G60010	AT1G60010	1.00799
103403506	1039859959	XM_008342348.2	AT5G49620	MYB78	1.00878
103442088	1039894326	XM_008380837.2	AT5G14040	PHT3;1	1.00905
103452956	1039843765	XM_008392479.2	AT1G78380	GSTU19	1.00905
103421740	658044671	XM_008359782.1		NA	1.00968
103439003	1039827495	XM_008377548.2	AT5G17680	AT5G17680	1.00985
103443866	1039895584	XM_008382763.2	AT5G45500	AT5G45500	1.0129
103434399	1039880140	XM_008372740.2	AT5G47770	FPS1	1.01297
103401770	1039848656	XM_008340490.2		NA	1.01334
103426955	1039928064	XM_017330003.1	AT5G04930	ALA1	1.01342
103429985	1039932070	XM_008368115.2	AT5G06900	CYP93D1	1.01449
103456023	1039848600	XM_008395647.2	AT5G11590	TINY2	1.01557
103421299	1039920293	XM_008359327.2	AT4G33790	CER4	1.0172
103444230	1039893213	XM_008383153.2		ODORANT1	1.01864
103406879	1039897234	XM_008345857.2	AT5G20230	BCB	1.01979
103441880	1039828333	XM_008380598.2	AT5G10970	AT5G10970	1.02027
103452937	1039842687	XM_008392465.2	AT5G01380	AT5G01380	1.02338
103403867	1039868474	XM_008342719.2	AT4G37530	AT4G37530	1.02359
103405413	1039862833	XM_008344414.2	AT1G72540	AT1G72540	1.02367
103431251	1039933711	XM_008369387.2	AT1G73500	MKK9	1.0241
103412641	1039908518	XM_008351183.2	AT5G19760	AT5G19760	1.02709
103415048	1039870230	XR_526140.2	AT1G55320	AAE18	1.02714
103447823	1039835355	XM_008387025.2	AT4G00870	AT4G00870	1.02743
103405965	1039865434	XM_008344993.2	AT4G01840	KCO5	1.02908
103436415	657944173	XM_008374844.1	AT1G06620	ACO1	1.02959
103403615	658010903	XM_008342464.1		ENOD2A	1.03273
103402978	1039854382	XM_008341771.2	AT1G70210	CYCD1;1	1.03381
103450046	1039840758	XM_008389362.2	AT2G37040	pal1	1.03395
103436247	1039880305	XM_008374669.2	AT1G09970	LRRXI-23	1.03523
103454204	1039847069	XM_008393796.2	AT4G39400	BRI1	1.03816
103421917	1039921274	XM_008359958.2	AT1G22360	UGT85A2	1.03959
103453312	1039842778	XM_008392850.2	AT1G35910	TPPD	1.03976
103406844	1039868968	XM_008345826.2	AT3G60190	DL1E	1.04006
103438873	1039885751	XM_008377416.2		NPC3	1.04035
103455928	1039852967	XM_008395539.2	AT4G37340	CYP81D3	1.04714
103402719	1039854126	XM_008341473.2	AT1G25500	AT1G25500	1.04784
103444105	1039893707	XM_017334392.1	AT2G31010	AT2G31010	1.05043
103452438	1039845179	XM_008391926.2	AT4G10620	AT4G10620	1.05155
103435365	1039877653	XM_008373753.2	AT1G79490	EMB2217	1.05204
103449094	1039834373	XM_008388376.2	AT3G63010	GID1B	1.05228
103418731	1039917085	XM_008356840.2	AT2G30490	C4H	1.05254
103453945	1039847434	XM_008393541.2	AT3G52890	KIPK	1.05357
103404279	1039863133	XM_008343173.2	AT5G40460	AT5G40460	1.05436
103428481	1039930101	XM_008366583.2	AT5G20230	BCB	1.05514
103433453	1039875443	XM_008371717.2	AT2G37790	AKR4C10	1.056
103443500	1039894674	XM_008382372.2	AT3G24170	GR1	1.06146
103443414	1039894399	XM_008382250.2	AT4G13930	SHM4	1.06235
103455115	1039845656	XM_017337249.1	AT3G55700	AT3G55700	1.06355
103402269	1039852745	XM_008341008.2	AT4G14090	AT4G14090	1.06393
103450006	1039840178	XM_008389325.2	AT5G65790	MYB68	1.06412
103448975	1039834818	XM_008388244.2	AT3G55120	TT5	1.06417
103404148	1039861813	XM_008343031.2	AT5G13200	AT5G13200	1.06492
103437352	1039884680	XM_008375819.2	AT3G61220	SDR1	1.06611
103442526	1039892563	XM_008381326.2		NA	1.06795
103400588	658004663	XM_008339240.1	AT3G24503	ALDH2C4	1.06862
103429052	1039930871	XM_008367200.2	AT3G02100	AT3G02100	1.06952
103419438	1039917934	XM_008357541.2	AT5G27760	AT5G27760	1.06999
103415548	1039913250	XM_008353868.2	AT4G30960	CIPK6	1.07214
103438701	1039886061	XM_008377251.2	AT3G54450	AT3G54450	1.07582
103455344	1039846737	XM_008394924.2		NA	1.07796
103455829	1039851060	XM_008395424.2	AT4G33010	GLDP1	1.08014
103402783	1039854852	XM_008341542.2	AT3G45080	AT3G45080	1.08287
103404033	1039854361	XM_017323452.1	AT1G32450	NRT1.5	1.08485
103441577	1039892141	XM_008380258.2	AT1G44350	ILL6	1.08505
103445128	658309981	NM_001293992.1	AT4G34640	SQS1	1.08596
103423267	1039923036	XM_008361335.2	AT3G57330	ACA11	1.08625
103447338	1039837231	XM_008386532.2	AT3G51770	ETO1	1.08949
103406241	1039896027	XM_008345244.2	AT5G54160	OMT1	1.09268
103405762	1039864747	XM_008344785.2	AT5G17380	AT5G17380	1.09477
103452251	1039842953	XM_008391765.2	AT1G15000	scpl50	1.0951
103441882	1039889563	XM_008380600.2	AT2G22850	bZIP6	1.09515
103438432	1039885392	XM_008376981.2		NA	1.09747
103402628	1039860981	XM_008341369.2	AT5G38110	ASF1B	1.09763
103412373	1039907864	XM_017326010.1		NA	1.09785
103406417	1039896376	XM_008345403.2	AT5G05600	AT5G05600	1.09799
103446772	1039834159	XM_008385905.2	AT4G22340	CDS2	1.10634
103416927	1039914781	XM_008355132.2	AT1G73050	AT1G73050	1.10679
103441584	1039891007	XM_008380264.2		EXT3	1.10689
103418114	1039916226	XM_017327517.1	AT5G57870	eIFiso4G1	1.10691
103413880	1039910099	XM_008352319.2	AT5G01210	AT5G01210	1.10815
103403494	1039859627	XM_008342339.2	AT3G55290	AT3G55290	1.10819
103455951	1039848779	XM_008395564.2	AT5G42830	AT5G42830	1.11282
103405859	1039865151	XM_008344874.2	AT2G30970	ASP1	1.11432
103439830	1039887782	XM_008378449.2	AT5G52920	PKP1	1.11452
103436071	1039879976	XM_008374479.2	AT1G80460	NHO1	1.11564
103448928	1039836268	XR_531299.2	AT1G03060	SPI	1.11627
103412173	1039907632	XM_008350768.2	AT3G07090	AT3G07090	1.11837
103443270	1039893511	XM_017334321.1	AT5G64300	GCH	1.12024
103453040	1039841981	XM_008392574.2	AT3G06270	AT3G06270	1.12449
103421112	658043464	XM_008359148.1	AT4G38830	CRK26	1.12721
103411526	1039906216	XM_008350152.2	AT1G61500	AT1G61500	1.12729
103411172	1039905894	XM_008349815.2	AT5G40200	DEG9	1.13032
103434866	1039880248	XM_008373231.2	AT1G29050	TBL38	1.13187
103416643	1039914258	XM_008354874.2	AT1G14185	AT1G14185	1.13385
103414668	1039870148	XM_008353033.2	AT5G56350	AT5G56350	1.13412
103447751	1039838048	XM_008386948.2	AT5G06900	CYP93D1	1.13467
103453536	1039844147	XR_531869.2	AT1G51760	IAR3	1.13567
103410588	1039904398	XM_008349273.2	AT4G19810	ChiC	1.13609
103446085	1039866379	XM_008385147.2	AT4G37850	AT4G37850	1.13672
103428450	1039930060	XM_008366553.2	AT3G14810	MSL5	1.13684
103412260	1039907724	XM_008350852.2	AT3G43190	SUS4	1.14051
103450666	1039841505	XM_008390039.2	AT5G36110	CYP716A1	1.14388
103438583	1039885375	XM_008377112.2	AT5G16080	CXE17	1.14781
103438424	1039827331	XM_008376978.2	AT2G34930	AT2G34930	1.15048
103452014	1039844800	XM_008391486.2	AT1G10740	AT1G10740	1.15268
103449926	1039840735	XM_008389253.2		NA	1.15301
103447716	1039837533	XM_008386907.2	AT2G28840	XBAT31	1.15441
103433744	1039875796	XM_008372022.2	AT5G01830	SAUR21	1.1545
103445778	1039830985	XM_008384818.2	AT3G26040	AT3G26040	1.15583
103402960	1039866166	XM_008341751.2		NA	1.15608
103406614	1039868902	XM_008345608.2	AT4G17080	AT4G17080	1.15706
103439958	1039885642	XM_008378606.2	AT5G54160	OMT1	1.15725
103415804	658033599	XM_008354087.1	AT4G10960	UGE5	1.15998
103424473	1039924695	XM_008362556.2	AT1G15530	AT1G15530	1.16239
103411699	1039906690	XM_008350333.2		PoxN1	1.16263
103408562	1039900547	XM_008347401.2	AT1G79990	AT1G79990	1.16414
103437710	1039884331	XM_008376206.2	AT5G33320	CUE1	1.16457
103453949	1039846026	XM_008393544.2	AT2G27690	CYP94C1	1.16589
103446076	1039866376	XM_017337408.1	AT2G22750	AT2G22750	1.16686
103444437	1039894194	XM_008383364.2	AT5G42260	BGLU12	1.16771
103427712	1039929119	XM_017330207.1	AT1G76690	OPR2	1.16921
103454643	1039845338	XM_008394244.2	AT3G61610	AT3G61610	1.17028
103451917	1039842123	XM_008391362.2	AT1G51760	IAR3	1.17079
103404047	1039853972	XM_008342903.2	AT5G49360	BXL1	1.17314
103431518	658063941	XM_008369683.1	AT5G17680	AT5G17680	1.17473
103431524	1039874296	XM_008369692.2	AT1G53240	mMDH1	1.17742
103410278	1039903894	XM_008349002.2	AT4G11170	AT4G11170	1.18402
103445265	657980947	XM_008384259.1	AT4G16890	SNC1	1.18419
103437261	1039882904	XM_008375734.2		NA	1.18514
103401259	1039847959	XM_008339967.2	AT5G66560	AT5G66560	1.18543
103451062	1039839469	XM_008390489.2	AT1G08650	PPCK1	1.18675
103454648	1039846039	XM_008394248.2	AT1G47670	AT1G47670	1.18842
103403673	1039854145	XM_008342515.2	MAL12_MALDOMajorallergenMald1(MaldI	Mald1	1.18844
103423272	1039923048	XM_008361340.2	AT2G41640	AT2G41640	1.19177
103434849	1039879035	XM_008373212.2	AT5G47220	ERF2	1.19241
103401733	1039848946	XM_008340456.2	AT1G11050	AT1G11050	1.19308
103428339	1039929891	XM_017330369.1	AT1G79990	AT1G79990	1.19339
103419553	658040557	XM_008357655.1	AT5G28830	AT5G28830	1.19422
103423970	1039924059	XM_008362043.2	PRS2_SOLTU	PRS2	1.19567
103451203	1039839896	XM_017336286.1	AT1G45616	RLP6	1.19652
103452611	1039842772	XM_008392127.2	AT2G47000	ABCB4	1.19819
103401086	1039849448	XM_008339793.2	AT5G66200	ARO2	1.20249
103436102	1039879117	XM_008374517.2		At2g27310	1.20312
103439928	1039888086	XM_008378575.2	AT5G53560	CB5-E	1.211
103422257	1039921624	XM_008360294.2	AT2G22250	ATAAT	1.2113
103445414	1039832796	XM_017335168.1	AT5G48840	PANC	1.21146
103428151	1039929706	XM_008366250.2	AT1G76360	AT1G76360	1.21196
103434157	1039876282	XM_008372469.2	AT4G14746	AT4G15450	1.21278
103412975	1039909037	XM_017326172.1		At1g07440	1.21316
103404362	1039865309	XM_008343263.2	AT3G28180	CSLC04	1.21473
103422259	1039921625	XM_017328669.1	AT4G39830	AT4G39830	1.21538
103409994	1039903425	XM_008348768.2	AT2G22250	ATAAT	1.21605
103452841	1039843574	XM_008392376.2	MAL12_MALDOMajorallergenMald1(MaldI	Mald1	1.21625
103440814	1039888966	XM_008379525.2	AT4G38620	MYB4	1.21625
103446099	1039825308	XM_008385198.2	AT5G65380	AT5G65380	1.21709
103434626	1039878302	XM_017332137.1	AT4G23180	CRK10	1.22122
103438934	658309641	NM_001293919.1	AT4G17500	ERF-1	1.22182
103419422	658040302	XM_008357528.1	AT1G80120	AT1G80120	1.22188
103421745	1039920908	XM_008359788.2	AT1G61480	AT1G61480	1.2227
103431655	657954485	XM_008369832.1	AT2G46150	AT2G46150	1.22348
103413242	658029006	XM_008351722.1	AT5G60770	NRT2.4	1.22384
103455892	1039851838	XM_008395507.2	AT1G27460	NPGR1	1.22393
103448961	1039836870	XM_017335804.1	AT1G03080	NET1D	1.22415
103456262	1039851471	XM_008395944.2	AT1G77280	CRLK1	1.22719
103451064	1039839450	XM_008390493.2	AT3G04520	THA2	1.22806
103441672	1039889331	XM_008380368.2		NA	1.22826
103409159	1039901732	XM_008347972.2		GSTU	1.23502
103433950	1039876108	XM_008372255.2	AT1G55020	LOX1	1.23623
103436863	1039883594	XM_008375312.2	AT3G48560	CSR1	1.23734
103450949	1039841113	XM_008390357.2	AT5G27450	MVK	1.23968
103440445	1039888990	XM_008379134.2	AT1G19270	DA1	1.24051
103412656	1039908553	XM_008351198.2	AT1G58170	AT1G58170	1.24143
103404483	1039862337	XM_008343401.2	AT5G39090	AT5G39090	1.24173
103424565	1039823687	XM_017334790.1	AT2G14960	GH3.1	1.24216
103427982	1039929485	XM_008366067.2	AT2G45430	AHL26	1.24245
103441233	1039889019	XM_008379934.2	AT2G24540	AFR	1.24997
103403453	1039858435	XM_008342293.2	AT1G31050	AT1G31050	1.25065
103441854	1039828331	XM_008380566.2	AT4G19800	AT4G19800	1.25081
103432494	1039874624	XM_008370697.2	AT3G62980	TIR1	1.25219
103435272	1039879721	XM_008373656.2		NA	1.25424
103400870	1039849042	XM_017322745.1	AT5G56960	AT5G56960	1.25852
103435899	1039880252	XM_008374328.2	AT3G25250	AGC2-1	1.25953
103454355	1039846308	XM_008393951.2	AT5G10530	AT5G10530	1.26026
103435177	1039878316	XM_008373573.2		NA	1.26169
103412494	1039908179	XM_008351045.2	AT1G11340	AT1G11340	1.26293
103401006	1039851572	XM_008339709.2	AT4G35630	PSAT	1.26441
103444796	1039832248	XM_017335078.1		NA	1.26484
103435823	1039879784	XM_008374243.2	AT3G07090	AT3G07090	1.26535
103427148	1039928351	XM_008365219.2	AT1G66700	PXMT1	1.27204
103444670	1039824305	XM_008383623.2		NA	1.27335
103451955	1039843786	XM_017336961.1	AT1G23800	ALDH2B7	1.27575
103453920	1039847236	XM_008393511.2	AT1G33110	AT1G33110	1.27721
103430141	1039932262	XM_008368272.2		DAAT	1.27898
103435356	1039880465	XM_008373745.2	AT1G16390	OCT3	1.27918
103423968	1039924051	XM_008362042.2	MAL12_MALDOMajorallergenMald1(MaldI	MAL12_MALDO	1.28042
103424089	658049388	XM_008362164.1	AT1G15960	NRAMP6	1.28295
103427807	1039929263	XM_008365888.2	AT4G22030	AT4G22030	1.28567
103435474	1039879664	XM_008373874.2		DOT1	1.28631
103452347	657995459	XM_008391844.1	AT1G27100	AT1G27100	1.29095
103450515	1039838611	XM_008389879.2	AT3G54040	AT3G54040	1.29249
103450600	1039841718	XM_008389967.2	AT5G01210	AT5G01210	1.29388
103432477	661567307	NM_001294353.1	AT3G63010	GID1B	1.29591
103423027	1039922714	XM_008361098.2	AT1G22360	UGT85A2	1.29934
103445251	1039830892	XM_008384246.2	AT2G17040	NAC036	1.301
103414311	1039910549	XM_017326502.1		GSTU17	1.30346
103449204	1039835369	XM_008388494.2	AT1G66350	RGL1	1.30423
103439032	1039886608	XM_008377584.2	AT2G45080	cycp3;1	1.30513
103437417	1039881939	XM_008375886.2	AT4G24110	AT4G24110	1.30542
103431534	1039934121	XM_008369699.2	AT4G29720	PAO5	1.30589
103408271	1039899998	XR_001786627.1	AT4G23060	IQD22	1.30661
103453486	1039865622	XM_008393032.2		NA	1.30776
103411651	1039906595	XM_008350280.2	AT5G11590	TINY2	1.30956
103445690	1039829518	XM_008384702.2	AT3G43190	SUS4	1.30974
103418129	1039916314	XM_008356275.2	AT5G20230	BCB	1.31381
103411915	1039907078	XM_008350531.2	AT5G54160	OMT1	1.31725
103448359	1039866062	XM_008387614.2	AT5G20050	AT5G20050	1.31865
103424704	1039925010	XM_008362800.2	AT5G50300	AZG2	1.31967
103445655	1039830845	XM_008384672.2	AT4G39830	AT4G39830	1.32001
103431532	1039934118	XM_008369697.2	AT3G28345	AT3G28345	1.32027
103445348	1039832158	XM_008384345.2	AT5G48540	AT5G48540	1.32541
103453066	1039841816	XM_008392599.2	AT5G19040	IPT5	1.32924
103432598	1039874725	XM_008370796.2	AT2G47590	PHR2	1.33074
103455190	1039845897	XM_008394775.2	AT3G07040	RPM1	1.33174
103416714	1039914593	XM_008354940.2	AT1G47980	AT1G47980	1.33188
103400713	1039849091	XM_008339376.2	AT3G28345	AT3G28345	1.33351
103452656	1039842614	XM_008392188.2	AT3G06490	MYB108	1.33443
103437129	1039882068	XM_008375582.2	AT5G53110	AT5G53110	1.3417
103433399	1039875333	XM_008371654.2		NA	1.3444
103406845	1039897193	XM_008345824.2	AT5G20700	AT5G20700	1.34493
103438447	1039885542	XM_008376989.2	AT5G19440	AT5G19440	1.34759
103410272	1039903948	XM_008349000.2	AT5G51670	AT5G51670	1.35008
103401158	1039852654	XM_008339871.2	AT1G08250	ADT6	1.35129
103415054	1039912104	XM_008353417.2	AT1G54220	AT1G54220	1.35269
103400440	1039848456	XM_008339091.2	AT5G20120	AT5G20120	1.35269
103423478	1039923331	XM_008361559.2	AT1G53870	AT1G53870	1.35419
103431060	1039933464	XM_017331129.1	AT3G10040	AT3G10040	1.35766
103449480	1039839301	XM_008388803.2	AT2G30830	AT2G30830	1.36045
103444691	1039831292	XM_008383646.2		NA	1.36194
103437780	1039884358	XM_008376282.2	AT1G79990	AT1G79990	1.36399
103452204	1039843462	XM_008391728.2	AT1G21270	WAK2	1.36446
103420384	1039919092	XM_008358448.2	AT1G79990	AT1G79990	1.36676
103433961	1039876134	XM_008372275.2	AT5G27450	MVK	1.37035
103455683	1039845361	XM_008395262.2	AT3G17700	CNBT1	1.37441
103451490	1039844188	XM_008390892.2			1.376
103437857	1039881775	XM_008376363.2	AT1G74360	AT1G74360	1.37613
103424886	1039925213	XM_008362973.2	AT4G30960	CIPK6	1.37773
103438401	1039824028	XM_008376956.2		At2g01680	1.37877
103427334	1039872281	XM_008365398.2	AT5G12860	DIT1	1.37956
103404781	1039861785	XM_008343742.2	AT3G25810	AT3G25810	1.38122
103405757	1039861431	XM_017323845.1		At1g61500	1.3813
103434002	1039876190	XM_008372315.2	AT3G06350	MEE32	1.38268
103446524	1039832290	XM_017335088.1		NA	1.38345
103451632	1039842413	XM_008391046.2	AT1G68360	AT1G68360	1.38605
103412527	657950707	XM_008351076.1	AT3G63440	CKX6	1.39211
103438914	1039885903	XM_017333164.1	AT5G12080	MSL10	1.39292
103438258	1039883042	XM_008376792.2	AT5G37490	AT5G37490	1.39486
103443326	1039828808	XM_008382143.2	AT5G52920	PKP1	1.40142
103450468	657991616	XR_531551.1		NA	1.40685
103455197	1039845443	XM_008394782.2	AT5G50130	AT5G50130	1.40726
103438021	1039882202	XM_008376559.2	AT1G70250	AT1G70250	1.41055
103431190	1039933635	XM_008369328.2	AT3G47500	CDF3	1.41147
103451644	657993968	XM_008391060.1	AT3G56970	bHLH38	1.41299
103442486	1039895180	XM_008381278.2	AT5G15870	AT5G15870	1.41365
103430794	1039933117	XM_017331057.1	AT5G05580	FAD8	1.41443
103404573	1039862527	XM_008343502.2	AT5G14760	AO	1.41514
103431786	1039934468	XM_008369956.2	AT3G02430	AT3G02430	1.41536
103437791	1039882948	XM_008376292.2	AT2G47140	SDR5	1.41622
103436830	1039882113	XM_008375276.2	AT4G19460	AT4G19460	1.418
103447197	1039837675	XM_008386376.2	AT5G47770	FPS1	1.4193
103431032	1039933408	XM_008369180.2	AT1G30650	WRKY14	1.42001
103435422	1039880250	XM_008373813.2	AT3G12920	BRG3	1.4205
103400401	1039865672	XM_017335718.1		At5g02620	1.42205
103434554	1039879297	XM_008372916.2	AT4G21410	CRK29	1.4257
103424195	658049611	XM_008362281.1		YLS9	1.42792
103430847	1039933206	XM_008368984.2	AT1G06650	AT1G06650	1.43116
103424358	1039924563	XM_008362445.2	AT2G41690	HSFB3	1.43299
103443482	1039894955	XM_008382342.2	AT2G32800	AP4.3A	1.43394
103414031	1039910464	XM_008352450.2	AT5G16440	IPP1	1.43575
103418383	657951854	XM_008356517.1	AT5G05340	PRX52	1.43672
103409750	1039865840	XM_008348550.2	AT2G35930	PUB23	1.43755
103409739	658022691	XM_008348532.1	AT1G79990	AT1G79990	1.43791
103404670	1039864253	XM_008343604.2	AT3G02360	AT3G02360	1.44243
103444435	657979250	XM_008383363.1		BGLU12	1.44601
103404043	1039859233	XM_008342898.2	AT3G23240	ERF1	1.44619
103445171	1039833405	XM_008384156.2	AT1G09970	LRRXI-23	1.4536
103421913	1039921193	XM_008359955.2	AT3G03210	AT3G03210	1.45647
103455946	1039848611	XM_008395559.2	AT4G06536	AT4G06536	1.45812
103455424	1039847558	XM_008395007.2	AT5G61040	AT5G61040	1.45838
103452567	1039866772	XM_008392074.2	AT1G65790	RK1	1.45901
103403702	664805959	NM_001300878.1	MAL12_MALDOMajorallergenMald1(MaldI	Mald1	1.46107
103451277	657993284	XM_008390701.1	AT4G36430	AT4G36430	1.47051
103450699	1039867103	XM_008390079.2	AT5G57050	ABI2	1.47209
103427815	1039929270	XM_008365895.2	AT4G23180	CRK10	1.47283
103433720	1039875757	XM_008371990.2	AT5G01720	AT5G01720	1.47497
103411726	658309445	NM_001293839.1		NA	1.4829
103439418	1039888336	XM_008377987.2	AT1G01120	KCS1	1.48292
103424244	658049705	XM_008362333.1	AT3G26040	AT3G26040	1.48525
103445047	1039834226	XM_008384010.2		NA	1.48682
103448568	1039838143	XM_008387829.2	AT5G05320	AT5G05320	1.48913
103411050	1039905395	XM_008349698.2	AT4G01010	CNGC13	1.49428
103430383	1039932593	XM_017330955.1		At2g29290	1.50033
103434169	1039876296	XM_008372483.2	AT3G04720	PR4	1.50081
103439089	1039886302	XM_017333233.1	AT4G27290	AT4G27290	1.50268
103426381	658053877	XM_008364477.1	AT3G55120	TT5	1.50749
103424545	1039924777	XM_008362626.2	AT3G47500	CDF3	1.50894
103413526	1039909713	XM_008351992.2	AT3G11820	SYP121	1.50917
103454501	1039845374	XM_008394087.2	AT2G03550	AT2G03550	1.50961
103447904	1039836623	XM_008387118.2	AT2G23770	LYK4	1.51792
103441008	1039890831	XM_008379710.2	AT5G65790	MYB68	1.52669
103435090	1039878436	XM_017332151.1	AT2G29120	GLR2.7	1.52863
103403116	1039860761	XM_008341939.2	AT1G13460	AT1G13460	1.52958
103401550	1039850120	XM_008340266.2	AT4G39330	CAD9	1.53185
103438762	1039886572	XM_008377305.2	loc_os12g3933012012.m07718proteinAP2domaincontainingprotein,expressedAP2AP2nooriginaldescription'	DREB1E	1.53367
103446991	1039834801	XM_008386164.2	AT4G10490	AT4G10490	1.54803
103437822	1039883694	XM_008376328.2	AT3G47520	MDH	1.54942
103427984	1039929490	XM_008366070.2	AT5G47770	FPS1	1.55523
103412876	1039869894	XM_008351388.2	AT5G19440	CCR1	1.55818
103402688	1039854953	XM_008341439.2		NA	1.55927
103429368	1039931247	XM_017330651.1		At4g00960	1.56769
103408235	1039825657	XM_008347119.2		NA	1.5701
103437831	1039881458	XM_008376336.2	AT5G61440	ACHT5	1.57292
103452632	1039843841	XM_008392153.2	AT1G02500	SAM1	1.57499
103427803	1039872346	XM_008365887.2		SD1.8	1.57823
103435806	657961700	XM_008374224.1	AT2G33150	PKT3	1.58459
103441149	657972567	XM_008379848.1		NA	1.58971
103449586	1039841251	XM_008388913.2	AT5G04870	CPK1	1.59003
103415496	1039913149	XM_008353822.2	AT1G15550	GA3OX	1.59338
103428350	1039873213	XM_008366458.2		WRKY31	1.59395
103417207	1039915149	XM_008355398.2	AT4G12650	AT4G12650	1.59624
103447380	1039834682	XM_008386567.2	AT1G76390	PUB43	1.59656
103443591	1039895485	XM_008382466.2	AT2G43120	AT2G43120	1.59727
103440566	1039889338	XM_008379266.2		NA	1.59757
103448903	1039836396	XM_008388162.2	AT3G14690	CYP72A15	1.5979
103431726	1039934390	XM_008369899.2	AT1G33800	GXMT1	1.59835
103444591	1039829266	XM_008383549.2	AT5G16360	AT5G16360	1.59887
103450195	1039838961	XM_008389505.2		NA	1.59892
103416191	1039913922	XM_008354452.2		MUB3	1.60083
103450242	1039841721	XM_008389561.2	AT5G02230	AT5G02230	1.60188
103431846	1039934551	XM_008370017.2	AT1G26810	GALT1	1.60275
103428484	658058020	XM_008366586.1		NA	1.60349
103422036	1039921358	XM_008360075.2	AT5G54160	OMT1	1.60693
103402868	1039854911	XM_008341646.2	AT2G03220	FT1	1.61128
103431664	657954487	XM_008369841.1		NA	1.61303
103435394	1039826791	XM_008373785.2	AT3G55580	AT3G55580	1.61448
103452043	1039844137	XM_008391518.2	AT3G55270	MKP1	1.62246
103447807	1039835656	XM_008387010.2	AT4G15350	CYP705A2	1.62417
103431360	1039872982	XM_008369512.2		NA	1.62533
103432249	1039935088	XM_008370430.2	AT1G31910	PMVK	1.62699
103400953	1039848809	XM_008339652.2	AT5G35550	MYB123	1.63312
103415143	1039912195	XM_008353497.2	AT5G61890	AT5G61890	1.63548
103407469	1039898422	XM_008346402.2	AT1G51410	AT1G51410	1.63573
103430265	1039826115	XM_008368428.2	AT2G37040	pal1	1.63988
103452836	657996449	XM_008392372.1	MAL12_MALDOMajorallergenMald1(MaldI	MAL12_MALDO	1.64062
103425562	1039926162	XM_017329623.1	AT3G29575	AFP3	1.64112
103432413	1039874510	XM_008370599.2	AT3G51895	SULTR3.1	1.64287
103414972	1039911924	XM_008353329.2	AT5G10530	AT5G10530	1.64724
103431604	1039874327	XM_008369773.2	AT1G78830	AT1G78830	1.64724
103412668	1039908480	XM_008351210.2	AT4G10490	AT4G10490	1.64812
103401798	1039868158	XM_008340519.2	AT3G50740	UGT72E1	1.65368
103411451	1039906169	XM_017325806.1	AT5G59810	SBT5.4	1.65415
103447501	1039837888	XM_008386697.2	AT5G12470	AT5G12470	1.65469
103448328	1039836660	XM_008387571.2	AT3G13080	ABCC3	1.65693
103427006	1039928146	XM_017330022.1	AT5G19440	AT5G19440	1.66122
103437792	1039882040	XM_008376293.2		NA	1.66159
103455201	1039847326	XM_008394787.2	AT4G20140	GSO1	1.6664
103407035	1039897593	XM_008345993.2	AT3G12500	HCHIB	1.67395
103420080	1039918753	XM_008358141.2	AT4G16260	AT4G16260	1.67424
103405603	1039862319	XM_008344613.2	AT5G64810	WRKY51	1.67778
103440461	1039824799	XM_008379155.2	AT4G25560	MYB18	1.67803
103404890	1039862660	XM_008343854.2	AT3G02550	LBD41	1.68002
103436968	1039882079	XM_008375430.2	AT4G17030	EXLB1	1.68077
103420705	1039919507	XM_008358751.2		NA	1.6813
103448535	1039838049	XM_008387800.2	AT1G52800	AOP3	1.6895
103403033	1039860055	XM_008341843.2	AT1G10670	ACLA-1	1.69323
103436462	1039877917	XM_008374887.2	loc_os09g2942012009.m06093proteinqueuinetRNA-ribosyltransferase,putative,expressedtgtTgtnooriginaldescription'	NA	1.69866
103420958	658043167	XM_008358994.1	AT2G18500	OFP7	1.70788
103453105	1039841998	XM_008392647.2	AT5G26340	MSS1	1.70875
103441059	1039825295	XM_008379786.2		At1g64065	1.70929
103432582	1039874695	XM_008370778.2	AT2G47800	ABCC4	1.70998
103434894	1039878650	XM_008373267.2	AT5G45800	MEE62	1.71287
103433949	658309395	NM_001294101.1	AT1G55020	LOX1	1.71499
103445275	1039831169	XM_017334862.1	AT1G47670	AT1G47670	1.71877
103447993	1039866624	XM_008387229.2	AT2G25060	ENODL14	1.73597
103410572	1039904407	XM_008349256.2	AT2G38970	AT2G38970	1.73689
103453569	658309466	NM_001293981.1	AT3G13790	BFRUCT1	1.7371
103410077	1039903510	XM_008348846.2	AT2G36690	AT2G36690	1.73785
103434082	1039877323	XM_017331992.1	AT5G02070	WAKL20	1.739
103401876	1039849933	XM_008340591.2	AT1G36940	AT1G36940	1.73951
103413146	1039909230	XM_008351636.2	AT5G12470	AT5G12470	1.73983
103429059	1039930892	XM_008367208.2	AT3G30390	AT3G30390	1.74011
103425071	1039925496	XM_008363145.2	AT2G23790	AT2G23790	1.74028
103452067	1039841967	XM_008391549.2	AT3G26090	RGS1	1.74456
103418130	1039916036	XM_008356276.2	AT2G25060	ENODL14	1.74457
103427367	1039928657	XM_008365423.2	AT3G14770	SWEET2	1.75634
103451819	1039843389	XM_008391247.2	AT3G28960	AVT1	1.76182
103449414	1039840446	XM_008388730.2	AT5G19790	ERFRAP2.11	1.76535
103402689	1039854955	XM_008341440.2		NA	1.76612
103410672	1039904511	XM_017325611.1	AT1G75820	CLV1	1.76987
103442120	1039893039	XM_008380876.2	AT5G13080	WRKY15	1.77861
103403151	1039868400	XM_008341982.2	AT4G36945	AT4G36945	1.78049
103407926	1039899282	XM_008346799.2		SD1.8	1.78492
103416185	1039913909	XM_008354443.2	AT1G22040	AT1G22040	1.78531
103413795	1039910015	XM_008352238.2	AT1G34300	AT1G34300	1.78676
103455383	1039846602	XM_008394970.2	AT3G25400	AT3G25400	1.7908
103401235	1039852716	XM_008339946.2	AT4G36790	AT4G36790	1.79162
103417863	1039915846	XM_008356020.2	AT5G52400	CYP715A1	1.79424
103414303	1039910796	XM_008352701.2	AT5G39660	CDF2	1.79508
103443479	1039893145	XM_008382339.2	AT4G13620	ERF062	1.80086
103447749	1039837881	XM_008386945.2	AT5G59790	AT5G59790	1.80528
103448216	1039835748	XM_017335627.1	AT1G21230	WAK5	1.80564
103452169	1039842469	XM_008391676.2	AT5G13080	WRKY75	1.80746
103425907	1039926680	XM_008364008.2	AT5G15710	AT5G15710	1.81296
103423066	1039871548	XM_017328091.1	AT5G60700	AT5G60700	1.81407
103416618	1039914297	XM_008354853.2	AT1G68760	NUDX1	1.81491
103455679	1039846024	XM_008395260.2		GLP6	1.815
103416716	1039914595	XM_008354942.2	AT5G49460	ACLB-2	1.82636
103422099	1039921431	XM_008360134.2	AT4G10490	AT4G10490	1.82691
103434645	1039881243	XM_008373000.2	AT5G54500	FQR1	1.8277
103455731	1039867717	XM_008395323.2	AT3G12500	CHT-2	1.83341
103405428	1039864397	XM_008344425.2	AT1G10340	AT1G10340	1.83382
103441502	1039889523	XM_008380181.2	AT3G07040	RPM1	1.83619
103439897	1039827786	XM_008378540.2	AT5G51810	GA20ox	1.83643
103442820	657975957	XM_008381621.1	AT5G19790	RAP2.11	1.83982
103425051	1039925476	XM_008363130.2	At1g76070	At1g76070	1.84506
103430592	1039932872	XM_008368738.2	AT5G08350	AT5G08350	1.84536
103418408	1039916617	XM_008356538.2	AT3G60810	AT3G60810	1.84889
103404195	1039862361	XM_008343084.2	AT3G01900	CYP94B2	1.85083
103400438	1039852034	XM_008339088.2	AT2G26830	emb1187	1.8523
103449761	1039838964	XM_008389086.2	AT2G41690	HSFB3	1.85254
103431212	657954394	XM_008369351.1	AT5G10530	AT5G10530	1.8623
103445780	1039831616	XM_008384821.2	AT3G26040	CER26-LIKE	1.88044
103423647	1039923471	XM_017329039.1	AT5G42260	BGLU12	1.88114
103451794	1039842908	XM_008391222.2	AT2G03220	FT1	1.88521
103425329	1039925874	XM_008363409.2		SULTR1.2	1.88525
103402190	1039868259	XM_008340929.2		SABP2	1.88684
103454167	1039846638	XM_008393757.2	AT3G11840	PUB24	1.89889
103442186	1039893141	XM_008380954.2	AT5G14360	BAG2	1.90016
103414495	1039873503	XM_008352872.2	AT3G13540	MYB5	1.90019
103424356	1039924561	XM_008362443.2		BBE1	1.90522
103427589	1039928937	XM_008365649.2	AT2G39730	RCA	1.922
103444016	1039893687	XM_008382924.2	AT2G41480	AT2G41480	1.92419
103402804	1039860931	XM_017323790.1	AT1G69170	AT1G69170	1.93419
103433572	1039875604	XM_008371836.2	AT2G38060	PHT4;2	1.93951
103449530	1039839363	XM_008388857.2	AT3G52780	PAP20	1.95424
103432559	1039873773	XM_008370753.2	AT2G47810	NF-YB5	1.95478
103454151	1039845578	XM_008393741.2	AT3G52490	AT3G52490	1.95505
103411956	1039907195	XM_008350566.2	AT1G66920	AT1G66920	1.95546
103406632	1039896786	XM_017324516.1		NA	1.95587
103446294	1039832392	XM_008385378.2	AT3G26570	PHT2;1	1.96652
103451588	1039842822	XM_008391002.2	AT2G01340	At17.1	1.97422
103441423	1039891552	XM_008380102.2	AT1G22400	UGT85A1	1.9809
103454095	657998967	XM_008393682.1		NA	1.98339
103447705	1039866577	XM_008386895.2	AT5G34930	AT5G34930	1.98548
103419731	1039918268	XM_008357825.2	PPO_MALDOPolyphenoloxidase,chloroplastprecursor(EC1.10.3.1	PPO_MALDO	1.9857
103428439	1039930047	XM_008366542.2	AT3G54250	MVD2	1.98619
103421201	1039920116	XM_008359234.2	AT2G26560	PLP2	1.98905
103438672	1039888573	XM_008377212.2	AT1G33260	AT1G33260	1.99019
103422086	1039871392	XM_008360128.2	AT5G60540	PDX2	2.0031
103436598	1039877934	XM_008375039.2	AT4G39955	AT4G39955	2.0066
103420533	1039919302	XM_008358593.2		FOX5	2.00869
103433681	1039875693	XM_008371951.2	AT5G01550	LECRKA4.2	2.00933
103429192	1039931044	XM_008367331.2	AT5G48230	ACAT2	2.01256
103442691	1039893969	XM_008381510.2		AHL26	2.01329
103442244	1039824820	XM_008381018.2	AT5G10530	LECRK91	2.01843
103417733	658037101	XM_008355889.1	AT1G21210	WAK4	2.02086
103414997	1039870203	XM_008353357.2	AT4G25650	ACD1-LIKE	2.02136
103454789	1039823571	XM_008394411.2		NA	2.02808
103418872	1039917200	XM_008356980.2	AT5G60700	AT5G60700	2.02899
103435501	657961069	XM_008373899.1		NA	2.03838
103427614	1039928990	XM_008365682.2		LAC7	2.0394
103409584	1039902423	XM_008348400.2	AT5G20230	BCB	2.04099
103440476	1039825274	XM_008379204.2	MAL12_MALDOMajorallergenMald1(MaldI	Mald1	2.0469
103418594	1039870822	XM_008356704.2	AT2G30090	AT2G30090	2.04692
103431308	1039933794	XM_008369452.2	AT1G47480	AT1G47480	2.05105
103444754	1039830682	XM_008383703.2	AT5G51920	AT5G51920	2.05151
103435157	658309653	NM_001294005.1	AT2G39690	AT2G39690	2.05735
103427010	1039928150	XM_008365087.2	AT5G19440	AT5G19440	2.06423
103409320	1039902040	XM_008348128.2	AT1G58440	XF1	2.0649
103408934	1039901111	XM_008347748.2	AT2G29120	GLR2.7	2.06998
108173724	1039886665	XR_001790430.1		NA	2.07067
103443075	1039893484	XM_017334310.1	AT2G04160	AIR3	2.08207
103408694	1039869286	XM_008347527.2	AT3G54250	MVD2	2.08442
103409539	1039869493	XM_008348365.2	AT3G26040	AT3G26040	2.08746
103411043	1039823616	XM_008349728.2	AT5G14940	AT5G14940	2.08873
103402218	1039848664	XM_008340963.2	AT1G76690	OPR2	2.10096
103438726	657967618	XM_008377272.1		NA	2.10187
103445750	1039832649	XM_008384779.2	AT3G14420	GOX1	2.10813
103424684	1039925231	XM_008362779.2	AT1G15960	NRAMP6	2.11117
103443601	1039893994	XM_008382476.2	AT1G32910	HST	2.1142
103443059	657976364	XM_008381846.1		NA	2.11638
103452602	1039842119	XM_008392114.2	AT1G48320	DHNAT1	2.12529
103423117	1039922836	XM_008361186.2	AT2G47810	NF-YB5	2.12572
103405277	658014304	XM_008344251.1	AT1G16260	AT1G16260	2.12812
103437308	1039882539	XM_008375785.2	AT5G20230	BCB	2.15047
103432875	1039826183	XM_008371087.2		NA	2.15369
103433547	1039876735	XM_017331816.1	AT3G09220	LAC7	2.15827
103416301	1039914060	XM_008354560.2	AT5G54160	OMT1	2.16473
103438445	1039827338	XM_008376991.2		GLUD2	2.16504
103451242	1039840379	XM_008390670.2	AT2G40740	WRKY55	2.16993
103411346	658025602	XM_008349985.1	AT5G14940	AT5G14940	2.18246
103447984	1039866622	XM_017322739.1	AT5G20230	BCB	2.19034
103403390	1039858870	XM_008342209.2	AT5G08350	GEM6	2.19287
103431581	1039874329	XM_008369748.2	AT1G78850	AT1G78850	2.19487
103419371	658040222	XM_008357485.1	AT5G54160	OMT1	2.19573
103439587	1039885033	XM_008378147.2	AT5G47220	ERF2	2.19984
103444755	1039832947	XM_008383704.2	AT4G11820	HMGS	2.202
103408136	1039899750	XM_008347003.2	PRS2_SOLTUPathogenesis-relatedproteinSTH-2-Solanumtuberosum(Potato	PRS2	2.20663
103447994	1039836715	XM_008387228.2		CYP716A52v2	2.21599
103411615	1039906493	XM_008350246.2	AT1G32910	HST	2.21773
103451027	1039840822	XM_008390452.2	AT1G60710	ATB2	2.21799
103450407	1039838870	XM_017336110.1		GLX	2.22217
103431313	1039933801	XM_008369459.2	AT5G25880	NADP-ME3	2.22656
103411644	1039906582	XM_017325845.1		ABCG35	2.22998
103436400	1039879274	XM_008374828.2	AT3G49940	LBD38/mdLBD28	2.2347
103443264	1039895227	XM_008382081.2	AT5G26340	MSS1	2.23781
103446634	1039831826	XM_008385769.2		At1G11410	2.24112
103420792	1039919610	XM_017328209.1	AT5G53130	CNGC1	2.24253
103444963	657980325	XM_008383931.1	AT4G10490	AT4G10490	2.24509
103416849	1039914698	XM_008355062.2	AT3G22600	AT3G22600	2.24641
103429977	1039932059	XM_008368107.2	AT5G02230	AT5G02230	2.24719
103445323	1039832212	XM_008384317.2	AT2G15220	AT2G15220	2.25032
103446762	659066179	NM_001294118.1	AT1G05010	EFE	2.2535
103400403	1039847850	XM_008339052.2	AT2G25060	ENODL14	2.25656
103442157	1039894909	XM_008380919.2		LHT1	2.25683
103453940	1039846811	XM_008393536.2	AT4G25490	CBF1	2.26133
103439201	658309502	NM_001293941.1		NA	2.2699
103443847	1039892885	XM_008382746.2	AT3G45290	MLO3	2.27075
103420366	1039919061	XM_008358427.2	AT1G75290	AT1G75290	2.27662
103437972	1039881562	XM_017332667.1	AT5G13210	AT5G13210	2.27888
103440381	1039825271	XM_008379089.2	MAL12_MALDOMajorallergenMald1(MaldI	Mald1	2.28414
103443776	657977939	XM_008382670.1	AT3G16340	ABCG29	2.29685
103409064	658021421	XM_008347883.1		NA	2.29741
103446365	1039831146	XM_008385455.2	AT2G39200	MLO12	2.2999
103455680	1039845492	XM_008395261.2		GLP6	2.30492
103453478	1039866112	XM_008393021.2	AT1G55850	CSLE1	2.30596
103433894	1039876010	XM_008372185.2	AT3G05640	ERG1	2.3107
103440154	657970565	XM_008378818.1	AT5G53130	CNGC1	2.31949
103441965	1039891667	XM_008380681.2		CYP98A2	2.32879
103420781	1039919603	XM_008358824.2	AT1G21460	SWEET1	2.32936
103400775	1039849403	XM_008339445.2	AT5G25930	AT5G25930	2.35891
103401808	1039868161	XM_008340526.2	AT3G50740	UGT72E1	2.36156
103416926	1039914780	XM_008355131.2	AT5G54160	OMT1	2.36542
103412578	1039908338	XM_008351121.2		CRK10	2.37376
103455268	1039865656	XM_017335656.1	AT1G03670	AT1G03670	2.37442
103436398	1039879260	XM_008374826.2	AT3G49940	LBD38	2.37798
103414926	1039911821	XM_008353283.2	AT3G11840	PUB24	2.37943
103423083	1039922788	XM_008361151.2	AT4G14640	CAM8	2.38157
103401302	1039849957	XM_008340014.2	AT2G15220	AT2G15220	2.38208
103434748	1039880530	XM_008373106.2	PPO_MALDOPolyphenoloxidase,chloroplastprecursor(EC1.10.3.1	PPO_MALDO	2.38517
103451996	1039842719	XM_008391458.2	AT1G23390	AT1G23390	2.38621
103440164	1039886531	XM_017333290.1	AT5G06370	AT5G06370	2.39051
103410295	1039903912	XM_008349010.2	AT1G21460	SWEET1	2.39166
103417538	1039915516	XM_008355715.2	AT1G35720	ANNAT1	2.39256
103412438	1039908140	XM_008350998.2	PPO_MALDO Polyphenoloxidase,chloroplastprecursor(EC1.10.3.1	PPO_MALDO	2.39955
103438489	1039885991	XM_008377030.2		NA	2.40381
103449254	1039835978	XM_008388541.2	AT1G03840	MGP	2.41459
103452047	1039843415	XM_008391522.2	AT1G67800	AT1G67800	2.41729
103452842	1039843578	XM_008392377.2	MAL12_MALDOMajorallergenMald1(MaldI	MAL12_MALDO	2.42073
103410840	1039904888	XM_008349498.2	AT1G22360	UGT85A2	2.43579
103426793	1039927810	XM_008364868.2		NA	2.4481
103406936	1039897418	XM_008345901.2	AT5G56960	AT5G56960	2.46005
103414583	1039911105	XM_008352950.2	MAL12_MALDOMajorallergenMald1(MaldI	Mald1	2.46042
103443008	1039828675	XM_008381794.2	AT4G25640	DTX35	2.46445
103404783	1039863270	XM_008343744.2	AT3G49950	AT3G49950	2.4696
103446154	1039830906	XM_008385229.2		NA	2.47434
103447995	1039835003	XM_008387230.2		CYP716A52v2	2.4749
103424699	1039925004	XM_008362796.2	AT5G25880	NADP-ME3	2.47686
103436257	1039878190	XM_008374679.2	AT4G34950	AT4G34950	2.48668
103442020	1039890494	XM_008380762.2	AT4G31940	CYP82C4	2.49087
103424812	1039924945	XM_008362907.2	AT3G47570	AT3G47570	2.4916
103429129	658059365	XM_008367275.1	AT5G14940	NRT1	2.49262
103406025	1039863048	XM_017324092.1	AT5G16340	AT5G16340	2.50117
103418570	1039916813	XM_008356682.2	AT2G38750	ANNAT4	2.51495
103455518	1039867676	XM_008395112.2	AT2G17500	AT2G17500	2.51571
103451221	1039840149	XM_008390652.2	AT3G51680	SDR2	2.52031
103444243	1039829120	XM_008383167.2	AT2G46620	AT2G46620	2.52158
103431261	1039933739	XM_008369397.2		GLP6	2.52196
103432488	1039874620	XM_008370692.2	AT5G62000	ARF2	2.52469
103406962	1039897206	XM_017324565.1	AT4G24000	CSLG2	2.52521
103433614	1039876582	XM_008371884.2	AT5G01380	AT5G01380	2.52725
103436337	657944167	XM_008374761.1	AT4G21700	AT4G21700	2.5285
103402505	658008555	XM_008341255.1	AT5G42260	BGLU12	2.53233
103424622	1039924889	XM_008362719.2		At5G39150	2.53259
103416222	1039913956	XM_008354485.2		NA	2.54412
103412344	1039907913	XM_008350924.2		NA	2.54675
103447600	1039836464	XM_008386795.2	AT5G58400	AT5G58400	2.54691
103424691	1039925234	XM_008362788.2	AT2G26560	PLP2	2.56288
103419466	1039917984	XM_008357560.2	AT5G24910	CYP714A1	2.56323
103409759	1039902941	XM_008348554.2		FERONIA	2.5674
103425935	1039926765	XM_008364029.2	AT4G16740	TPS03	2.57343
103453496	1039867255	XM_017323599.1	AT4G23990	CSLG3	2.5922
103455273	1039847385	XM_008394864.2		GLP	2.59503
103454572	1039845932	XM_008394172.2	AT2G41380	AT2G41380	2.60253
103443888	1039894099	XM_008382786.2	AT3G54220	SCR	2.60388
103435875	1039879091	XM_008374304.2	AT4G13010	AT4G13010	2.60677
103406852	1039896876	XM_017324535.1	AT4G14305	AT4G14305	2.6206
103401439	1039850012	XM_008340150.2	AT5G42930	AT5G42930	2.63263
103432798	1039876560	XM_017331782.1	AT5G67550	AT5G67550	2.63407
103436104	1039878056	XM_008374518.2	AT5G50080	ERF110	2.6457
103453251	1039866094	XM_017336913.1		NA	2.65147
103409309	1039902028	XM_008348117.2	AT4G34950	AT4G34950	2.65195
103414723	1039911372	XM_008353089.2	AT3G23240	ERF1	2.66555
103443848	1039893255	XM_008382747.2	AT1G47670	AT1G47670	2.6664
103404960	1039861329	XM_008343921.2	AT1G05010	EFE	2.66929
103409777	1039902968	XM_008348568.2	AT4G36220	FAH1	2.67762
103400961	1039850322	XM_008339660.2	AT1G19250	FMO1	2.67906
103439452	1039885261	XM_008378016.2	AT5G54160	OMT1	2.67929
103409163	1039901677	XM_008347975.2	AT3G23990	HSP60	2.68116
103421459	1039920524	XM_008359499.2	AT5G40690	AT5G40690	2.68493
103420662	1039919479	XM_008358713.2	AT1G08440	AT1G08440	2.70259
103437984	1039884722	XM_008376517.2	AT5G07990	TT7	2.71591
103413892	1039910238	XM_008352332.2	AT4G08250	AT4G08250	2.71813
103405792	658015382	XM_008344804.1	AT1G20030	AT1G20030	2.72144
103403698	1039857667	XM_008342538.2	AT4G17030	EXLB1	2.72625
103405132	1039862308	XM_008344095.2	AT3G59030	TT12	2.75077
103429453	1039873481	XM_008367603.2	AT3G48280	HSP20	2.76902
103451997	1039844310	XM_008391459.2	AT1G10670	ACLA-1	2.77269
103435086	1039879224	XM_008373479.2	AT5G46060	AT5G46060	2.77353
103428019	1039929558	XM_008366111.2		GSTU	2.77405
103411142	1039905828	XM_008349788.2	AT5G40610	GPDHp	2.77651
103415373	1039912664	XM_008353709.2		GLP6	2.77977
103445465	657942546	XM_008384519.1		NA	2.78301
103427593	1039928986	XM_008365661.2		At2g29290	2.785
103418662	1039916941	XM_008356771.2	AT5G06720	PA2	2.78823
103437319	1039884489	XM_008375796.2	AT4G11820	HMGS	2.79405
103412667	1039908478	XM_008351209.2	AT2G36690	AT2G36690	2.79656
103428609	1039930249	XM_017330448.1		NA	2.79811
103450918	1039824974	XM_008390662.2	AT1G64160	DIR5	2.81171
103405269	1039863568	XM_008344244.2	AT3G22060	AT3G22060	2.81184
103429692	1039931652	XM_008367825.2	PPO_MALDOPolyphenoloxidase,chloroplastprecursor(EC1.10.3.1	PPO_MALDO	2.82291
103452809	1039843643	XM_008392345.2	AT3G03450	RGL2	2.82705
103448960	1039835147	XM_008388220.2		NA	2.82981
103446500	1039832245	XM_008385636.2	AT1G76690	OPR2	2.85885
103438049	1039881299	XM_008376585.2	AT1G15125	AT1G15125	2.8646
103403338	658010259	XM_008342150.1		ATJ20	2.87323
103426049	658053232	XM_008364136.1	AT1G19390	AT1G19390	2.88964
103405299	1039863081	XM_017324100.1	AT4G08850	AT4G08850	2.89048
103433549	1039876713	XM_008371813.2		LAC7	2.89161
103452844	1039843576	XM_008392379.2	MAL12_MALDOMajorallergenMald1(MaldI	Mald1	2.90797
103452775	1039844119	XM_008392311.2	AT5G49460	ACLB-2	2.91417
103445664	1039832433	XM_017335113.1	AT3G54220	SCL1	2.9159
103410304	1039903993	XM_008349021.2	AT3G16520	UGT88A1	2.91646
103416972	658035742	XM_008355181.1	AT2G16890	AT2G16890	2.91758
103420552	1039919285	XM_017328133.1	AT5G61890	AT5G61890	2.9524
103447496	1039834413	XM_008386693.2	AT1G52800	AOP3	2.95838
103430184	1039932332	XM_008368320.2	AT3G51895	SULTR3.1	2.97338
103445646	1039829657	XM_008384662.2	AT1G06620	AT1G06620	2.97402
103450680	1039838992	XM_008390053.2	AT2G38290	ATAMT2	2.97433
103429696	1039931654	XM_017330742.1	AT1G76680	OPR1	2.98401
103445744	1039833488	XM_008384767.2	AT1G52800	AOP3	2.98664
103428584	1039930251	XM_008366698.2		NA	2.99022
103411927	1039907060	XM_017325902.1		NA	2.99249
103453300	1039843168	XM_008392840.2		NA	2.99754
103433014	1039876295	XM_008371238.2	AT4G11650	OSM34	3.0235
103439689	1039885867	XM_008378277.2	AT4G25420	GA20ox	3.02536
103411735	1039906845	XM_008350366.2	AT1G20030	AT1G20030	3.02954
103428961	1039930750	XM_008367097.2	AT2G40890	CYP98A3	3.03887
103400019	1039852585	XM_008338700.2	AT4G19810	ChiC	3.04119
103417108	1039915065	XM_008355307.2	AT3G25810	TPS24	3.04748
103449631	657989931	XM_008388963.1		NA	3.04981
103402546	1039850192	XM_017323047.1	AT2G44480	BGLU17	3.05332
103404658	1039868627	XM_008343593.2	AT4G23990	CSLG3	3.05707
103443287	1039893258	XM_008382107.2	AT1G79670	RFO1	3.06239
103446989	1039835032	XM_008386163.2	AT4G10490	AT4G10490	3.07449
103442597	1039894095	XM_008381404.2	AT2G32380	AT2G32380	3.1059
103417109	1039915025	XM_008355309.2	AT3G25810	TPS24	3.10664
103413226	1039909307	XM_017326234.1	AT1G67280	AT1G67280	3.13153
103441519	1039891236	XM_008380195.2	AT3G16780	AT3G16780	3.13219
103450582	1039839524	XM_017336206.1	AT4G31940	CYP82C4	3.13588
103402179	1039852835	XM_008340918.2	AT1G78780	AT1G78780	3.14658
103419230	1039917680	XM_008357346.2	AT1G03220	AT1G03220	3.154
103454840	1039845287	XM_008394435.2	AT4G10490	AT4G10490	3.15906
103428597	1039930263	XM_008366711.2	AT2G37210	LOG3	3.18781
103408456	1039900373	XM_008347306.2	AT2G44840	ERF13	3.20402
103430768	1039933094	XM_008368912.2	MAL12_MALDOMajorallergenMald1(MaldI	MAL12_MALDO	3.23018
103404453	1039863431	XM_008343365.2	AT5G39670	AT5G39670	3.25126
103402475	1039849772	XM_008341229.2	AT2G01170	BAT1	3.26139
103446097	1039832410	XM_008385156.2		GLP	3.26347
103453750	1039842870	XM_008393318.2	AT4G31940	CYP82C4	3.28228
103410171	658023479	XM_008348921.1		NA	3.28514
103452835	1039844311	XM_008392371.2	MAL12_MALDOMajorallergenMald1(MaldI	MAL12_MALDO	3.28542
103419724	1039918291	XM_017327926.1	loc_os06g2157012006.m06814proteinmyrosinaseprecursor,putative,expressednooriginaldescription'		3.29584
103431632	1039934241	XM_008369803.2	AT4G39330	CAD9	3.29595
108174800	1039839854	XM_017336277.1	AT4G31940	CYP82C4	3.30797
103429959	1039931957	XM_008368090.2	AT1G73050	AT1G73050	3.31278
103426173	1039926950	XM_008364262.2	AT1G20030	AT1G20030	3.33679
103422635	1039922158	XM_008360688.2	AT5G24910	CYP714A1	3.37628
103447536	1039836443	XM_008386736.2	AT2G26560	PLP2	3.37904
103410384	658023828	XM_008349090.1		At1g64065	3.39806
103431501	1039873645	XM_008369663.2		NA	3.42333
103438289	657966712	XM_008376832.1		GLP6	3.42471
103436582	1039880792	XM_017332553.1	AT5G64290	DIT2.1	3.43381
103427625	1039929002	XM_008365693.2	AT2G44840	ERF13	3.45939
103420666	1039919469	XM_008358717.2	AT4G10490	AT4G10490	3.49039
103452840	1039843579	XM_008392374.2	MAL12_MALDOMajorallergenMald1(MaldI	MAL12_MALDO	3.4959
103447446	1039838239	XM_008386633.2	AT1G73050	AT1G73050	3.49688
103448503	1039834800	XM_008387761.2	AT3G26310	CYP71B35	3.501
103422998	1039922685	XM_008361064.2	AT3G26310	CYP71B35	3.50206
103405050	1039862334	XM_008344020.2	AT5G47650	NUDT2	3.51329
103432719	1039874990	XM_008370913.2	AT3G59400	GUN4	3.51972
103446096	1039832389	XM_008385155.2		GLP	3.52093
103448484	1039834927	XM_017335465.1	AT1G11840	GLX1	3.52267
103417632	1039873563	XM_008355808.2	AT5G56260	AT5G56260	3.52461
103423966	1039924050	XM_008362039.2	MAL12_MALDOMajorallergenMald1(MaldI	Mald1	3.52817
103450583	1039839857	XM_017336278.1	AT4G31940	CYP82C4	3.55641
103408654	1039900734	XM_008347488.2	AT4G10490	AT4G10490	3.55745
103416713	1039914594	XM_008354939.2	AT1G47980	AT1G47980	3.56537
103415736	1039913348	XM_008354031.2		NA	3.56665
103418180	1039916278	XM_008356321.2	AT4G26270	PFK3	3.60154
103424908	1039925290	XM_008362995.2		BAM3	3.61138
103434870	1039877589	XM_017332036.1	AT4G35540	AT4G35540	3.61373
103405278	658014306	XM_008344252.1	AT1G16130	WAKL2	3.62667
103406377	1039896218	XM_017324439.1	AT2G39490	AT2G39490	3.6436
103448502	1039835034	XM_008387760.2	AT5G07990	CYP736A12	3.68511
103422279	1039921671	XM_008360326.2	AT1G47480	AT1G47480	3.74015
103414397	1039910591	XM_008352785.2	AT1G68390	AT1G68390	3.74308
103401072	657948485	XM_008339783.1		NA	3.75029
103452838	1039842733	XM_008392373.2	MAL12_MALDOMajorallergenMald1(MaldI	Mald1	3.75871
103413950	1039910363	XM_008352383.2	loc_os06g2157012006.m06814proteinmyrosinaseprecursor,putative,expressednooriginaldescription'		3.76922
103435858	1039880850	XM_017332558.1	AT4G27870	AT4G27870	3.77176
103453814	1039843309	XM_008393395.2	AT3G22060	AT3G22060	3.79646
103434011	657958079	XM_008372323.1	AT4G08250	AT4G08250	3.79893
103426514	1039927421	XM_008364599.2	AT5G48100	TT10	3.8207
103453959	657998722	XM_008393552.1	AT5G19790	RAP2.11	3.8704
103425667	1039926349	XM_008363755.2	AT3G21550	DMP2	3.90907
103449899	1039866940	XM_008389227.2	AT4G26270	PFK3	3.91536
103446504	1039832192	XM_008385640.2	AT1G76690	OPR2	3.92173
103410839	1039904886	XM_008349497.2	AT1G22360	UGT85A2	3.95012
103436348	1039878485	XM_008374768.2	AT2G44450	BGLU15	3.96457
103417342	1039915320	XM_008355534.2	AT5G48930	HAST	4.01596
103414362	1039910477	XM_008352756.2	AT1G14550	AT1G14550	4.01967
103427739	1039929206	XM_008365810.2	AT3G22930	CML11	4.02328
103441452	1039890326	XM_017333763.1	AT1G22400	UGT85A1	4.03624
103441025	1039892079	XM_008379728.2	AT4G38830	AT4G38830	4.12843
103431585	1039934214	XM_008369751.2	AT2G26560	PLP2	4.14407
103409334	1039902056	XM_017325247.1	AT2G44480	BGLU17	4.17955
103416527	1039914311	XM_008354772.2	AT1G70170	MMP	4.18691
103431506	1039934107	XM_008369666.2	AT3G54420	EP3	4.19959
103414570	1039911055	XM_008352939.2	AT3G03450	RGL2	4.24098
103425577	1039926181	XM_008363666.2	AT1G70170	MMP	4.28028
103415428	1039912882	XM_008353761.2	AT1G34300	PK1	4.34113
103411778	1039906911	XM_008350400.2	AT5G16340	AT5G16340	4.35422
103456011	1039849220	XM_008395633.2	AT2G46150	AT2G46150	4.36046
103407335	1039898044	XM_008346270.2	AT5G42650	AOS	4.39371
103452680	1039843070	XM_017336819.1	AT2G39200	MLO12	4.48066
103415737	1039913349	XM_008354032.2	CPC_CUCSACucumberpeelingcupredoxin(CPC	NA	4.48626
103410386	658023830	XM_008349091.1		At1g64065	4.48729
103435120	1039878660	XM_008373510.2	AT1G17010	AT1G17010	4.50305
103446463	1039830701	XM_008385585.2	AT2G29990	NDA2	4.58941
103422534	1039921956	XM_008360601.2	AT5G47650	NUDT2	4.5965
103423780	1039923799	XM_008361858.2		CYP749A22	4.59826
103419198	1039917635	XM_008357314.2	AT3G54420	CHIB	4.60384
103437001	657964127	XM_008375468.1	AT1G52800	AOP3	4.60424
103436625	1039878411	XM_008375070.2	AT2G36690	AT2G36690	4.61538
103431295	1039933985	XM_008369434.2	AT1G34300	AT1G34300	4.61732
103407076	1039897638	XM_008346030.2	AT5G53760	MLO11	4.61982
103420796	1039871112	XM_008358838.2	AT1G73050	AT1G73050	4.63992
103413073	1039909169	XM_008351564.2		PDR2	4.66986
103445510	657981469	XM_008384532.1	AT4G27190	AT4G27190	4.68708
103427427	1039928715	XM_008365478.2	AT1G05840	AT1G05840	4.69632
103403474	1039854913	XM_008342322.2	AT4G17260	AT4G17260	4.6972
103408266	1039899989	XM_008347125.2	AT4G11650	OSM34	4.70061
103431578	1039934181	XM_008369744.2		GLX1	4.83668
103406196	1039895935	XM_008345199.2	AT1G70170	MMP	4.84027
103409148	1039901663	XM_008347964.2	AT5G24510	AT5G24510	4.85243
103425339	658051823	XM_008363417.1		ATJ20	4.86842
103444148	1039895208	XM_008383063.2	AT1G20030	AT1G20030	4.87085
103414363	1039910679	XM_008352757.2	AT1G14550	AT1G14550	4.89902
103441505	1039828196	XM_008380187.2	AT4G31940	CYP82C4	4.9075
103430059	1039932155	XM_008368189.2	AT4G16260	AT4G16260	4.91616
103434225	1039876391	XM_008372544.2	AT5G38280	PR5K	4.92694
103453406	1039842023	XM_008392950.2	AT2G38870	AT2G38870	4.9495
103456250	1039848040	XM_008395933.2	AT5G13930	CHS	4.97418
103453193	1039843672	XM_008392743.2	AT1G47480	AT1G47480	5.06309
103416348	658034611	XM_008354605.1		ATJ20	5.09188
103429376	1039931260	XM_008367529.2	AT1G20030	AT1G20030	5.12668
103428960	1039930749	XM_008367096.2	AT4G24280	cpHsc70-1	5.15543
103403467	1039856970	XM_008342315.2	AT1G59960	AT1G59960	5.16698
103423157	1039873749	XM_008361230.2		ACA7	5.16809
103436475	657963050	XM_008374904.1	AT1G50090	BCAT7	5.18219
103429895	1039931958	XM_017330807.1	AT1G73050	At1g73050	5.18247
103444729	1039829709	XM_008383683.2	AT1G34060	AT1G34060	5.20064
103411053	1039905410	XM_008349702.2	AT2G40890	CYP98A3	5.2567
103401323	1039850135	XM_008340036.2		GLX1	5.36369
103440330	1039890927	XM_008379004.2	AT4G34860	A/N-InvB	5.44453
103434354	1039876570	XM_017331784.1	AT2G19230	AT2G19230	5.46662
108173809	1039889498	XR_001790597.1	AT2G26560	PLP2	5.49202
103412482	1039908142	XM_017326045.1	AT5G50400	PAP27	5.62788
103435122	1039878661	XM_017332208.1		NA	5.64582
103409894	1039903072	XM_017325414.1	AT1G31710	AT1G31710	5.65529
103437074	1039883111	XM_008375534.2	AT1G52800	AOP3	5.73595
103403490	1039859269	XM_008342335.2	AT1G59960	AT1G59960	5.76582
103454806	1039846886	XM_008394403.2	AT1G63410	AT1G63410	5.78219
103420189	658041731	XM_008358255.1	AT1G52800	AOP3	5.87978
103418590	1039916850	XM_008356699.2	AT5G13930	CHS	5.8842
103411893	657950621	XM_008350510.1	loc_os10g2805012010.m05688proteinchitinase2,putative,expressednooriginaldescription'	NA	5.88549
103450577	1039839851	XM_008389942.2	loc_os05g5030012005.m09099proteinPOLYKETIDESYNTHASEPROTEIN,putative,expressedPRK12476PRK05850PRK05691PRK07769CaiCAMP-bindingPRK09192PRK07768PRK05851AcsEntFFAA1PRK06087PRK08314PRK09274PRK04813nooriginaldescription'	FadD26	5.97123
103439178	1039885975	XM_008377726.2	AT3G48690	CXE12	5.99282
103414418	1039910518	XM_008352802.2	AT3G21360	AT3G21360	6.00456
103424764	1039925103	XM_008362861.2	AT5G13930	CHS	6.04092
103442872	1039893410	XM_017334280.1	AT1G21850	sks8	6.08989
103434738	1039879209	XM_008373094.2	AT1G16250	AT1G16250	6.19578
103407103	1039897755	XM_008346053.2	AT1G06620	ACO	6.19848
103400169	1039850765	XM_008338840.2	AT2G26560	PLP2	6.22958
103420898	1039919725	XM_017328233.1	AT1G75620	AT1G75620	6.26835
103438321	1039882156	XM_008376870.2	AT1G31690	AT1G31690	6.35757
103440276	1039889419	XM_008378949.2		GLX1	6.4425
103421205	1039920119	XM_017328323.1		PLP2	6.54791
103408983	1039901299	XM_017325148.1		At5g38940	6.56932
103428516	1039930141	XM_008366618.2	AT5G54160	OMT1	6.64969
103418561	658038659	XM_008356674.1	loc_os10g2805012010.m05688proteinchitinase2,putative,expressednooriginaldescription'	CTL2	6.76157
103447903	1039836538	XM_008387117.2		ACA7	6.79669
103410426	1039904146	XM_008349129.2		GLX1	6.8112
103419753	1039918309	XM_008357847.2	AT1G17020	SRG1	6.84264
108172251	1039926027	XM_017329601.1	AT2G26710	BAS1	6.98601
103418415	658038395	XM_008356545.1	loc_os08g3766012008.m07751proteinbluecopperproteinprecursor,putative,expressednooriginaldescription'	NA	6.99692
103435195	1039878070	XM_008373590.2	AT5G38940	AT5G38940	7.30466
103452843	1039843577	XM_008392378.2	MAL12_MALDOMajorallergenMald1(MaldI	MAL12_MALDO	7.43174
103437000	1039883333	XM_008375467.2	AT1G52800	AOP1	7.4704
103407511	1039898436	XM_017324737.1	AT5G13930	CHS	7.62531
103454938	1039846403	XM_008394529.2	AT5G61820	AT5G61820	7.62702
103435101	657960279	XM_008373493.1	AT1G56580	SVB	7.67238
103418282	658038150	XM_008356417.1	AT5G55050	AT5G55050	7.90575
103414194	1039910672	XM_008352598.2	AT3G17820	GLN1.3	7.9238
103434012	657958081	XM_008372324.1	NSP2_MEDTRNodulationsignalingpathway2protein-Medicagotruncatula(Barrelmedic	SCL26	8.09751
103430711	1039932935	XM_008368860.2	AT5G61820	AT5G61820	8.11313
103448492	1039866677	XM_008387753.2	AT1G04110	SDD1	8.25559
103415892	1039913522	XM_008354170.2	AT1G31812	ACBP6	8.4942
103438956	1039886696	XM_008377497.2	AT3G57270	GNS	8.57924
103455021	1039845818	XM_008394614.2	AT5G13930	CHS	8.73211
103417335	1039915261	XM_008355528.2	AT5G45890	SAG12	8.86642
103452129	1039866333	XM_008391626.2		NA	8.86793
103419426	658040309	XM_008357531.1	AT1G27040	AT1G27040	8.9632
103446094	657982660	XM_008385153.1		GLP2.1	8.99834
103410516	1039904187	XM_017325559.1		ACP	9.17597
103429951	1039931946	XM_008368081.2	AT1G52800	AOP3	9.285
103426298	658053709	XM_008364388.1	AT3G55100	ABCG17.2	9.57022
103440144	657970551	XM_008378810.1	AT5G43370	APT1	9.64728
103427717	658056514	XM_008365791.1	AT1G27040	AT1G27040	9.65733
103405545	1039862901	XM_008344559.2	AT5G45890	SAG12	9.83174
108169585	1039850641	XM_017323086.1	AT1G69680	AT1G69680	9.9585
103453371	1039843625	XM_008392915.2	AT3G62020	GLP7	9.96407
103431434	658063771	XM_008369590.1	AT2G38290	ATAMT2	10.0846
103422527	657952700	XM_008360596.1	RUAP_SOYBNRuBisCO-associatedprotein-Glycinemax(Soybean	CHI2L	10.3055
103414711	658031637	XM_008353077.1	AT1G02335	GLP9	10.3481
103436898	1039883210	XM_008375353.2		NA	10.3578
103406639	658016984	XM_008345626.1	AT5G43370	APT1	10.8478
103443856	1039893632	XM_017334369.1	AT5G55050	GDSL	11.1776
103403661	658010969	XM_008342502.1	AT5G45890	SAG39-like	11.3735
103454774	658000298	XM_008394376.1	AT2G25940	ALPHA-VPE	11.6277
103455997	658002684	XM_008395618.1	AT3G63470	SCPL3	11.9932
103415037	658032243	XM_008353400.1	AT1G04110	SBT1.3	12.3011
103405895	658015593	XM_008344919.1	AT1G78380	GSTU19	12.5916
103444789	1039831325	XM_017334893.1	AT1G04110	SDD1	12.9848
103452112	657947450	XM_008391602.1	AT2G25060	ENODL14	13.175
103453966	657998732	XM_008393558.1	AT3G17675	SLP1	13.4217

## Sheet: Mr5_output
Mr5 KEGG output
Kegg_ID	Pathway	Number of genes(Mr5)
mdm00010	Glycolysis / Gluconeogenesis	7
mdm00020	Citrate cycle (TCA cycle)	8
mdm00030	Pentose phosphate pathway	1
mdm00040	Pentose and glucuronate interconversions	1
mdm00052	Galactose metabolism	2
mdm00053	Ascorbate and aldarate metabolism	4
mdm00061	Fatty acid biosynthesis	1
mdm00062	Fatty acid elongation	1
mdm00071	Fatty acid degradation	3
mdm00073	Cutin, suberine and wax biosynthesis	1
mdm00100	Steroid biosynthesis	2
mdm00130	Ubiquinone and other terpenoid-quinone biosynthesis	3
mdm00220	Arginine biosynthesis	3
mdm00240	Pyrimidine metabolism	1
mdm00250	Alanine, aspartate and glutamate metabolism	5
mdm00260	Glycine, serine and threonine metabolism	6
mdm00270	Cysteine and methionine metabolism	13
mdm00280	Valine, leucine and isoleucine degradation	7
mdm00290	Valine, leucine and isoleucine biosynthesis	2
mdm00310	Lysine degradation	3
mdm00330	Arginine and proline metabolism	4
mdm00340	Histidine metabolism	1
mdm00350	Tyrosine metabolism	7
mdm00360	Phenylalanine metabolism	6
mdm00380	Tryptophan metabolism	9
mdm00400	Phenylalanine, tyrosine and tryptophan biosynthesis	5
mdm00410	beta-Alanine metabolism	4
mdm00460	Cyanoamino acid metabolism	6
mdm00480	Glutathione metabolism	5
mdm00500	Starch and sucrose metabolism	4
mdm00513	Various types of N-glycan biosynthesis	1
mdm00520	Amino sugar and nucleotide sugar metabolism	6
mdm00531	Glycosaminoglycan degradation	1
mdm00561	Glycerolipid metabolism	5
mdm00562	Inositol phosphate metabolism	1
mdm00564	Glycerophospholipid metabolism	8
mdm00565	Ether lipid metabolism	2
mdm00591	Linoleic acid metabolism	2
mdm00592	alpha-Linolenic acid metabolism	6
mdm00620	Pyruvate metabolism	11
mdm00630	Glyoxylate and dicarboxylate metabolism	7
mdm00640	Propanoate metabolism	1
mdm00650	Butanoate metabolism	4
mdm00660	C5-Branched dibasic acid metabolism	1
mdm00670	One carbon pool by folate	1
mdm00710	Carbon fixation in photosynthetic organisms	4
mdm00750	Vitamin B6 metabolism	2
mdm00760	Nicotinate and nicotinamide metabolism	1
mdm00770	Pantothenate and CoA biosynthesis	4
mdm00780	Biotin metabolism	1
mdm00900	Terpenoid backbone biosynthesis	10
mdm00903	Limonene and pinene degradation	1
mdm00904	Diterpenoid biosynthesis	3
mdm00906	Carotenoid biosynthesis	1
mdm00908	Zeatin biosynthesis	4
mdm00909	Sesquiterpenoid and triterpenoid biosynthesis	2
mdm00910	Nitrogen metabolism	5
mdm00940	Phenylpropanoid biosynthesis	19
mdm00941	Flavonoid biosynthesis	4
mdm00945	Stilbenoid, diarylheptanoid and gingerol biosynthesis	3
mdm00950	Isoquinoline alkaloid biosynthesis	7
mdm00960	Tropane, piperidine and pyridine alkaloid biosynthesis	6
mdm00966	Glucosinolate biosynthesis	1
mdm00999	Biosynthesis of various plant secondary metabolites	3
mdm01040	Biosynthesis of unsaturated fatty acids	1
mdm01100	Metabolic pathways	125
mdm01110	Biosynthesis of secondary metabolites	107
mdm01200	Carbon metabolism	15
mdm01210	2-Oxocarboxylic acid metabolism	3
mdm01212	Fatty acid metabolism	3
mdm01230	Biosynthesis of amino acids	14
mdm01240	Biosynthesis of cofactors	14
mdm01250	Biosynthesis of nucleotide sugars	1
mdm02010	ABC transporters	4
mdm03010	Ribosome	4
mdm03015	mRNA surveillance pathway	1
mdm03022	Basal transcription factors	1
mdm03040	Spliceosome	1
mdm04016	MAPK signaling pathway	8
mdm04070	Phosphatidylinositol signaling system	5
mdm04075	Plant hormone signal transduction	9
mdm04120	Ubiquitin mediated proteolysis	2
mdm04130	SNARE interactions in vesicular transport	1
mdm04141	Protein processing in endoplasmic reticulum	1
mdm04144	Endocytosis	2
mdm04146	Peroxisome	7
mdm04626	Plant-pathogen interaction	8

## Sheet: M9_input
M9 input data for KEGG analysis
LOC	gene id	Number of genes M9	Analogue to	Symbols (DAVIDtool) Bold= used for Primervalidation	log2FC M9 (ARD/уARD)
103439689	1039885867	XM_008378277.2	AT4G25420	GA20ox	-7.03115
103413395	1039909534	XM_008351861.2	AT1G03020	AT1G03020	-5.05615
103404783	1039863270	XM_008343744.2	AT3G49950	AT3G49950	-4.36366
103418594	1039870822	XM_008356704.2	AT2G30090	AT2G30090	-4.17999
103439897	1039827786	XM_008378540.2	AT5G51810	GA20ox	-3.92903
103445664	1039832433	XM_017335113.1	AT3G54220	SCL1	-3.87599
103432719	1039874990	XM_008370913.2	AT3G59400	GUN4	-3.69323
103442820	657975957	XM_008381621.1	AT5G19790	RAP2.11	-3.63424
103449122	1039836712	XM_008388406.2	AT1G03020	AT1G03020	-3.34104
103449254	1039835978	XM_008388541.2	AT1G03840	MGP	-3.13887
103453300	1039843168	XM_008392840.2		NA	-3.0633
103435875	1039879091	XM_008374304.2	AT4G13010	AT4G13010	-3.03856
103453486	1039865622	XM_008393032.2		NA	-2.99399
103431501	1039873645	XM_008369663.2		NA	-2.97655
103434011	657958079	XM_008372323.1	AT4G08250	AT4G08250	-2.95519
103404713	1039862339	XM_008343660.2	AT5G38450	CYP735A1	-2.94418
103416294	1039914055	XM_008354554.2	AT3G19508	AT3G19508	-2.87874
103442303	1039895555	XM_017334724.1	AT3G28345	AT3G28345	-2.85293
103451550	1039843693	XM_008390961.2	AT3G62930	AT3G62930	-2.76937
103453959	657998722	XM_008393552.1	AT5G19790	RAP2.11	-2.70928
103447005	1039837009	XM_008386178.2	AT2G44130	AT2G44130	-2.69847
103449069	1039836221	XM_008388342.2		GDU5	-2.5949
103437000	1039883333	XM_008375467.2	AT1G52800	AOP1	-2.54385
103445775	1039831137	XM_008384813.2	AT1G24430	ACT	-2.54284
103419818	657952152	XM_008357912.1	AT5G01740	AT5G01740	-2.50051
103436400	1039879274	XM_008374828.2	AT3G49940	LBD38/mdLBD28	-2.46412
103415496	1039913149	XM_008353822.2	AT1G15550	GA3OX	-2.4475
103429129	658059365	XM_008367275.1	AT5G14940	NRT1	-2.44653
103403390	1039858870	XM_008342209.2	AT5G08350	GEM6	-2.37239
103443479	1039893145	XM_008382339.2	AT4G13620	ERF062	-2.35109
103425051	1039925476	XM_008363130.2	At1g76070	At1g76070	-2.33047
103452400	1039842104	XM_008391889.2		ARR11	-2.30591
103423117	1039922836	XM_008361186.2	AT2G47810	NF-YB5	-2.29678
103423478	1039923331	XM_008361559.2	AT1G53870	AT1G53870	-2.28619
103447823	1039835355	XM_008387025.2	AT4G00870	AT4G00870	-2.2176
103435422	1039880250	XM_008373813.2	AT3G12920	BRG3	-2.1889
103425267	658051671	XM_008363348.1	AT2G41640	AT2G41640	-2.17517
103413242	658029006	XM_008351722.1	AT5G60770	NRT2.4	-2.17414
103440461	1039824799	XM_008379155.2	AT4G25560	MYB18	-2.14304
103414570	1039911055	XM_008352939.2	AT3G03450	RGL2	-2.11502
103442409	1039894833	XM_008381192.2	AT3G02100	AT3G02100	-2.08591
103406845	1039897193	XM_008345824.2	AT5G20700	AT5G20700	-2.07547
103432041	1039934790	XM_008370208.2	AT3G28345	ABCB15	-2.05079
103424545	1039924777	XM_008362626.2	AT3G47500	CDF3	-2.04681
103451644	657993968	XM_008391060.1	AT3G56970	bHLH38	-2.03392
103411346	658025602	XM_008349985.1	AT5G14940	AT5G14940	-2.02747
103445780	1039831616	XM_008384821.2	AT3G26040	CER26-LIKE	-2.01062
103414303	1039910796	XM_008352701.2	AT5G39660	CDF2	-2.01004
103444754	1039830682	XM_008383703.2	AT5G51920	AT5G51920	-1.99284
103411043	1039823616	XM_008349728.2	AT5G14940	AT5G14940	-1.98668
103452809	1039843643	XM_008392345.2	AT3G03450	RGL2	-1.9765
103436398	1039879260	XM_008374826.2	AT3G49940	LBD38	-1.97532
103402936	1039860891	XM_008341721.2	AT3G01470	HB-1	-1.97367
103438473	1039884940	XM_008377014.2	AT3G63440	CKX6	-1.96735
103442186	1039893141	XM_008380954.2	AT5G14360	BAG2	-1.96446
103436532	1039826918	XM_017333272.1	AT3G21260	GLTP3	-1.95948
103449414	1039840446	XM_008388730.2	AT5G19790	ERFRAP2.11	-1.95936
103439703	1039885128	XM_008378289.2	AT5G51970	AT5G51970	-1.95267
103431190	1039933635	XM_008369328.2	AT3G47500	CDF3	-1.94075
103450407	1039838870	XM_017336110.1		GLX	-1.9279
103431534	1039934121	XM_008369699.2	AT4G29720	PAO5	-1.91576
103404890	1039862660	XM_008343854.2	AT3G02550	LBD41	-1.90593
103441149	657972567	XM_008379848.1		NA	-1.90132
103450468	657991616	XR_531551.1		NA	-1.85208
103438051	1039881988	XM_008376587.2	AT1G68040	AT1G68040	-1.84036
103437791	1039882948	XM_008376292.2	AT2G47140	SDR5	-1.84004
103456391	1039853817	XR_001785992.1	AT3G06240	AT3G06240	-1.82386
103449204	1039835369	XM_008388494.2	AT1G66350	RGL1	-1.79114
103422289	1039921682	XM_008360335.2	AT4G20140	GSO1	-1.79011
103431060	1039933464	XM_017331129.1	AT3G10040	AT3G10040	-1.78367
103424704	1039925010	XM_008362800.2	AT5G50300	AZG2	-1.77238
103414007	1039910431	XM_008352427.2		NA	-1.76022
103414495	1039873503	XM_008352872.2	AT3G13540	MYB5	-1.75953
103439543	1039885000	XM_008378102.2	AT4G14540	NF-YB3	-1.74889
103451497	1039842827	XM_008390901.2	AT1G31050	AT1G31050	-1.73138
103441882	1039889563	XM_008380600.2	AT2G22850	bZIP6	-1.72478
103451909	1039842098	XM_008391350.2	AT1G59940	ARR3	-1.72367
103447807	1039835656	XM_008387010.2	AT4G15350	CYP705A2	-1.72232
103440184	1039890627	XM_017333820.1	AT3G14940	PPC3	-1.70303
103447904	1039836623	XM_008387118.2	AT2G23770	LYK4	-1.70177
103456023	1039848600	XM_008395647.2	AT5G11590	TINY2	-1.69784
103420976	1039919842	XM_017328259.1		At5g10770	-1.69688
103421250	658043708	XM_008359276.1	AT4G32630	AT4G32630	-1.68729
103431032	1039933408	XM_008369180.2	AT1G30650	WRKY14	-1.66622
103453066	1039841816	XM_008392599.2	AT5G19040	IPT5	-1.66285
103413786	1039910000	XM_008352223.2	AT2G27230	LHW	-1.65259
103411615	1039906493	XM_008350246.2	AT1G32910	HST	-1.65016
103450408	1039839270	XM_008389749.2	AT1G75620	AT1G75620	-1.64807
103440164	1039886531	XM_017333290.1	AT5G06370	AT5G06370	-1.63315
103412690	1039908620	XR_525761.2	AT3G21560	UGT84A2	-1.63298
103403861	658011390	XM_008342713.1		NA	-1.61467
103443546	657977455	XM_008382420.1		G6PD2	-1.60444
103427376	1039928665	XM_008365431.2	AT3G63350	HSFA7B	-1.5957
103445047	1039834226	XM_008384010.2		NA	-1.5953
103400401	1039865672	XM_017335718.1		At5g02620	-1.58154
103434082	1039877323	XM_017331992.1	AT5G02070	WAKL20	-1.57772
103444435	657979250	XM_008383363.1		BGLU12	-1.57129
103436645	1039878496	XM_008375087.2	AT1G33440	AT1G33440	-1.56884
103439587	1039885033	XM_008378147.2	AT5G47220	ERF2	-1.56498
103427655	1039929049	XM_008365724.2	AT4G17900	AT4G17900	-1.55742
103425907	1039926680	XM_008364008.2	AT5G15710	AT5G15710	-1.54812
103443008	1039828675	XM_008381794.2	AT4G25640	DTX35	-1.54538
103405751	1039865227	XM_008344775.2	AT5G66590	AT5G66590	-1.54231
103455201	1039847326	XM_008394787.2	AT4G20140	GSO1	-1.52276
103434012	657958081	XM_008372324.1	NSP2_MEDTRNodulationsignalingpathway2protein-Medicagotruncatula(Barrelmedic	SCL26	-1.51093
103436134	1039880624	XM_008374557.2	AT2G44710	AT2G44710	-1.50832
103451632	1039842413	XM_008391046.2	AT1G68360	AT1G68360	-1.49097
103454479	1039845391	XR_532018.2	AT2G26560	PLP2	-1.47836
103455424	1039847558	XM_008395007.2	AT5G61040	AT5G61040	-1.47703
103443601	1039893994	XM_008382476.2	AT1G32910	HST	-1.473
103442244	1039824820	XM_008381018.2	AT5G10530	LECRK91	-1.46946
103445779	1039830525	XM_008384819.2	AT3G26040	CER26-LIKE	-1.46926
103432559	1039873773	XM_008370753.2	AT2G47810	NF-YB5	-1.46151
103420189	658041731	XM_008358255.1	AT1G52800	AOP3	-1.45001
103433720	1039875757	XM_008371990.2	AT5G01720	AT5G01720	-1.44903
103453312	1039842778	XM_008392850.2	AT1G35910	TPPD	-1.44602
103450853	1039838608	XM_008390255.2	AT1G09240	NAS3	-1.43445
103444437	1039894194	XM_008383364.2	AT5G42260	BGLU12	-1.42617
103455268	1039865656	XM_017335656.1	AT1G03670	AT1G03670	-1.4205
103437001	657964127	XM_008375468.1	AT1G52800	AOP3	-1.41105
103438762	1039886572	XM_008377305.2	loc_os12g3933012012.m07718proteinAP2domaincontainingprotein,expressedAP2AP2nooriginaldescription'	DREB1E	-1.40543
103410269	1039903944	XM_008348998.2	AT3G47420	G3Pp1	-1.40525
103411051	1039905400	XR_001786990.1	AT3G49670	BAM2	-1.40387
103448931	1039834751	XR_001791318.1	AT3G22830	HSFA6B	-1.40119
103424190	1039924369	XM_008362276.2	AT4G29920	AT4G29920	-1.39509
103421917	1039921274	XM_008359958.2	AT1G22360	UGT85A2	-1.38793
103446524	1039832290	XM_017335088.1		NA	-1.38667
103437417	1039881939	XM_008375886.2	AT4G24110	AT4G24110	-1.38515
103455197	1039845443	XM_008394782.2	AT5G50130	AT5G50130	-1.37936
103445795	1039834303	XM_008384849.2	AT3G12920	BRG3	-1.3767
103433894	1039876010	XM_008372185.2	AT3G05640	ERG1	-1.37107
103403453	1039858435	XM_008342293.2	AT1G31050	AT1G31050	-1.36651
103400953	1039848809	XM_008339652.2	AT5G35550	MYB123	-1.36537
103456262	1039851471	XM_008395944.2	AT1G77280	CRLK1	-1.36025
103419422	658040302	XM_008357528.1	AT1G80120	AT1G80120	-1.34881
103442768	1039893326	XM_008381576.2		NA	-1.33735
103437792	1039882040	XM_008376293.2		NA	-1.33694
103429052	1039930871	XM_008367200.2	AT3G02100	AT3G02100	-1.33355
103414481	658031233	XM_008352858.1	AT3G58060	MTPC4	-1.32156
103411651	1039906595	XM_008350280.2	AT5G11590	TINY2	-1.31623
103440814	1039888966	XM_008379525.2	AT4G38620	MYB4	-1.30036
103455892	1039851838	XM_008395507.2	AT1G27460	NPGR1	-1.29993
103448302	1039866661	XM_008387554.2	AT1G15410	AT1G15410	-1.29471
103456343	1039853262	XM_017323343.1	AT1G05690	BT3	-1.29359
103437822	1039883694	XM_008376328.2	AT3G47520	MDH	-1.29089
103448903	1039836396	XM_008388162.2	AT3G14690	CYP72A15	-1.29013
103425943	1039926718	XM_008364040.2		WRKY31	-1.28872
103433107	1039874870	XR_529084.2	AT5G03420	AT5G03420	-1.2781
103424089	658049388	XM_008362164.1	AT1G15960	NRAMP6	-1.27252
103439032	1039886608	XM_008377584.2	AT2G45080	cycp3;1	-1.27143
103436948	657964005	XM_008375402.1	AT4G17670	AT4G17670	-1.26888
103450982	1039840085	XR_001791642.1		NA	-1.26416
103402804	1039860931	XM_017323790.1	AT1G69170	AT1G69170	-1.2633
103448620	1039837822	XM_008387883.2	AT1G22360	UGT85A2	-1.26213
103430815	1039933156	XM_008368956.2	AT3G23600	AT3G23600	-1.25865
103454083	1039847073	XM_008393669.2	AT2G18050	HIS1-3	-1.2581
103452438	1039845179	XM_008391926.2	AT4G10620	AT4G10620	-1.2571
103428594	1039930261	XM_008366709.2	AT1G75710	AT1G75710	-1.25484
103454481	1039867502	XM_008394070.2	AT1G20823	AT1G20823	-1.23626
103435365	1039877653	XM_008373753.2	AT1G79490	EMB2217	-1.21109
103436415	657944173	XM_008374844.1	AT1G06620	ACO1	-1.20582
103438359	1039888427	XM_008376906.2	AT5G40850	UPM1	-1.20551
103455383	1039846602	XM_008394970.2	AT3G25400	AT3G25400	-1.20515
103439070	1039886819	XM_008377623.2	AT3G62950	AT3G62950	-1.18745
103448743	1039837539	XM_008388011.2	AT3G15030	TCP4	-1.18171
103450502	1039840258	XM_008389866.2		DIR1	-1.17809
103414248	1039910732	XM_008352645.2	AT1G68640	PAN	-1.17368
103420322	1039919020	XM_008358380.2	AT1G60010	AT1G60010	-1.17185
103455928	1039852967	XM_008395539.2	AT4G37340	CYP81D3	-1.16927
103432305	1039935171	XM_017331465.1	AT1G66140	ZFP4	-1.16608
103446591	1039834193	XM_008385721.2		HBP-1b	-1.15901
103445690	1039829518	XM_008384702.2	AT3G43190	SUS4	-1.15703
103441880	1039828333	XM_008380598.2	AT5G10970	AT5G10970	-1.15535
103437831	1039881458	XM_008376336.2	AT5G61440	ACHT5	-1.15369
103405837	1039862117	XM_008344846.2	AT1G66140	ZFP4	-1.15135
103429453	1039873481	XM_008367603.2	AT3G48280	HSP20	-1.14756
103432494	1039874624	XM_008370697.2	AT3G62980	TIR1	-1.14684
103412260	1039907724	XM_008350852.2	AT3G43190	SUS4	-1.14432
103410272	1039903948	XM_008349000.2	AT5G51670	AT5G51670	-1.14301
103440802	1039892113	XR_530151.2	AT5G27730	AT5G27730	-1.12761
103424684	1039925231	XM_008362779.2	AT1G15960	NRAMP6	-1.12649
103439337	1039887903	XM_008377890.2	AT1G01360	RCAR1	-1.12357
103453050	1039841849	XM_008392583.2		GS2	-1.11739
103401259	1039847959	XM_008339967.2	AT5G66560	AT5G66560	-1.10993
103431518	658063941	XM_008369683.1	AT5G17680	AT5G17680	-1.10747
103455011	1039847446	XR_001785629.1		NA	-1.10354
103417733	658037101	XM_008355889.1	AT1G21210	WAK4	-1.08232
103430592	1039932872	XM_008368738.2	AT5G08350	AT5G08350	-1.07947
103441233	1039889019	XM_008379934.2	AT2G24540	AFR	-1.07837
103454151	1039845578	XM_008393741.2	AT3G52490	AT3G52490	-1.07477
103449787	1039839063	XM_008389108.2	AT3G10040	AT3G10040	-1.07309
103432549	1039874640	XM_008370739.2	AT5G27690	AT5G27690	-1.07282
103402722	1039860941	XM_008341476.2	AT1G25550	AT1G25550	-1.07212
103427982	1039929485	XM_008366067.2	AT2G45430	AHL26	-1.06412
103405906	1039868789	XM_008344934.2	AT2G45430	AHL22	-1.06404
103451819	1039843389	XM_008391247.2	AT3G28960	AVT1	-1.05846
103445767	1039831027	XM_008384806.2	AT1G56010	NAC1	-1.05749
103452139	1039842597	XM_008391634.2	AT1G13710	CYP78A5	-1.05597
103424200	1039924378	XM_017329242.1	AT4G30110	HMA2	-1.05276
103449094	1039834373	XM_008388376.2	AT3G63010	GID1B	-1.05069
103440436	1039889905	XM_008379121.2	AT2G23790	AT2G23790	-1.05012
103408074	1039899568	XM_017324901.1	AT3G22830	HSFA6B	-1.04229
103406614	1039868902	XM_008345608.2	AT4G17080	AT4G17080	-1.04177
103451604	1039842304	XM_008391017.2		NA	-1.03402
103400424	1039848089	XM_008339072.2	AT5G20150	SPX1	-1.02445
103445747	1039832650	XM_008384770.2	AT1G19800	ABCI14	-1.01889
103451062	1039839469	XM_008390489.2	AT1G08650	PPCK1	-1.01154
103412527	657950707	XM_008351076.1	AT3G63440	CKX6	-1.00676
103422257	1039921624	XM_008360294.2	AT2G22250	ATAAT	1.0018
103421260	1039920224	XR_527221.2		NA	1.00503
103427593	1039928986	XM_008365661.2		At2g29290	1.00851
103405762	1039864747	XM_008344785.2	AT5G17380	AT5G17380	1.01072
103443118	657976474	XM_008381901.1		NA	1.01219
103453920	1039847236	XM_008393511.2	AT1G33110	AT1G33110	1.01225
103436912	1039884525	XM_008375366.2	AT2G23910	AT2G23910	1.01553
103416551	1039914486	XM_008354799.2	AT4G32180	PANK2	1.01553
103433162	1039874955	XM_008371398.2	AT1G01630	AT1G01630	1.01822
103435025	1039881075	XM_008373422.2	AT1G30320	AT1G30320	1.01936
103430455	1039932681	XM_008368590.2	AT5G05180	AT5G05180	1.02084
103438107	1039883466	XM_008376649.2	AT1G10170	NFXL1	1.02271
103455848	658309805	NM_001293949.1	AT4G08150	KNAT1	1.0255
103411050	1039905395	XM_008349698.2	AT4G01010	CNGC13	1.0269
103441584	1039891007	XM_008380264.2		EXT3	1.02985
103427589	1039928937	XM_008365649.2	AT2G39730	RCA	1.03009
103404658	1039868627	XM_008343593.2	AT4G23990	CSLG3	1.03363
103442486	1039895180	XM_008381278.2	AT5G15870	AT5G15870	1.03366
103401022	1039848209	XM_008339725.2	AT4G17500	ERF-1	1.03372
103409309	1039902028	XM_008348117.2	AT4G34950	AT4G34950	1.04145
103436635	657963380	XM_008375078.1	AT1G31130	AT1G31130	1.04189
103411923	1039907139	XM_017325908.1	AT5G17680	AT5G17680	1.04413
103403692	1039854007	XM_008342533.2	AT4G16120	COBL7	1.04717
103402934	1039859985	XM_017323700.1	AT1G69840	AT1G69840	1.04969
103450733	1039840102	XM_008390106.2	AT5G58380	SIP1	1.05001
103437501	658309957	NM_001294058.1	AT5G64300	GCH	1.054
103403506	1039859959	XM_008342348.2	AT5G49620	MYB78	1.05617
103440445	1039888990	XM_008379134.2	AT1G19270	DA1	1.0571
103413548	1039870066	XM_008352017.2	AT2G31955	CNX2	1.06192
103403033	1039860055	XM_008341843.2	AT1G10670	ACLA-1	1.06267
103436185	1039877925	XM_008374609.2	AT3G26040	AT3G26040	1.06357
103436606	1039826940	XM_017333284.1	AT5G17680	AT5G17680	1.06652
103445609	1039830951	XM_008384622.2	AT2G20470	AT2G20470	1.06782
103445128	658309981	NM_001293992.1	AT4G34640	SQS1	1.06981
103421955	1039871368	XM_008359998.2	AT2G28510	AT2G28510	1.07067
103411172	1039905894	XM_008349815.2	AT5G40200	DEG9	1.07262
103416585	1039914526	XM_008354827.2	AT1G27330	AT1G27330	1.07353
103406025	1039863048	XM_017324092.1	AT5G16340	AT5G16340	1.0775
103434554	1039879297	XM_008372916.2	AT4G21410	CRK29	1.07968
103441423	1039891552	XM_008380102.2	AT1G22400	UGT85A1	1.08197
103400588	658004663	XM_008339240.1	AT3G24503	ALDH2C4	1.08305
103443845	1039892697	XM_008382744.2	AT3G45970	EXLA1	1.08494
103428450	1039930060	XM_008366553.2	AT3G14810	MSL5	1.08607
103409912	1039903181	XM_008348700.2	AT3G20100	CYP705A19	1.09359
103441661	1039891248	XM_008380353.2	AT2G22500	UCP5	1.0939
103411142	1039905828	XM_008349788.2	AT5G40610	GPDHp	1.09413
103431336	1039933842	XM_008369485.2	AT5G10695	AT5G10695	1.10033
103432582	1039874695	XM_008370778.2	AT2G47800	ABCC4	1.10191
103439911	1039888679	XM_008378552.2	AT2G46620	AT2G46620	1.10209
103435637	1039826889	XM_008374035.2		GRPA3	1.1033
103409167	1039901747	XR_525098.2	AT1G77120	ADH1	1.10812
103406612	1039896764	XM_008345604.2	AT5G48100	TT10	1.10907
103425071	1039925496	XM_008363145.2	AT2G23790	AT2G23790	1.10981
103406417	1039896376	XM_008345403.2	AT5G05600	AT5G05600	1.1102
103424949	1039925331	XM_008363032.2	AT3G24503	ALDH2C4	1.11073
103422556	1039922035	XM_008360619.2	AT3G13620	PUT4	1.11127
103436598	1039877934	XM_008375039.2	AT4G39955	AT4G39955	1.11448
103409750	1039865840	XM_008348550.2	AT2G35930	PUB23	1.11688
103442591	1039893960	XM_008381397.2	AT3G01190	AT3G01190	1.12033
103430265	1039826115	XM_008368428.2	AT2G37040	pal1	1.12131
103420417	1039919154	XM_008358477.2	AT3G17800	AT3G17800	1.12183
103452047	1039843415	XM_008391522.2	AT1G67800	AT1G67800	1.12341
103421740	658044671	XM_008359782.1		NA	1.12657
103417108	1039915065	XM_008355307.2	AT3G25810	TPS24	1.12696
103446006	1039833066	XM_008385064.2	AT5G44790	RAN1	1.1298
103449107	1039866783	XM_008388392.2	AT3G24500	MBF1C	1.13055
103433961	1039876134	XM_008372275.2	AT5G27450	MVK	1.13222
103436830	1039882113	XM_008375276.2	AT4G19460	AT4G19460	1.13242
103446085	1039866379	XM_008385147.2	AT4G37850	AT4G37850	1.13553
103436439	1039880578	XR_529553.2	AT3G19480	AT3G19480	1.13937
103419065	1039917493	XR_526869.2	AT1G53590	NTMC2T6.1	1.1506
103446099	1039825308	XM_008385198.2	AT5G65380	AT5G65380	1.15582
103439958	1039885642	XM_008378606.2	AT5G54160	OMT1	1.15585
103453040	1039841981	XM_008392574.2	AT3G06270	AT3G06270	1.15628
103432249	1039935088	XM_008370430.2	AT1G31910	PMVK	1.15706
103416191	1039913922	XM_008354452.2		MUB3	1.15781
103448928	1039836268	XR_531299.2	AT1G03060	SPI	1.16012
103428355	1039929952	XM_017330379.1		At1g02270	1.16258
103443500	1039894674	XM_008382372.2	AT3G24170	GR1	1.16509
103416870	1039914737	XM_017327202.1	AT3G07040	RPM1	1.16613
103455979	1039852517	XM_008395596.2	AT1G47380	AT1G47380	1.16712
103438583	1039885375	XM_008377112.2	AT5G16080	CXE17	1.16712
103424473	1039924695	XM_008362556.2	AT1G15530	AT1G15530	1.16885
103418346	1039916522	XM_008356475.2	AT4G31480	AT4G31480	1.17922
103442289	1039893913	XM_008381068.2	AT3G28210	AT3G28210	1.17967
103441502	1039889523	XM_008380181.2	AT3G07040	RPM1	1.18224
103435796	1039877802	XM_008374210.2	AT4G19420	AT4G19420	1.18391
103450006	1039840178	XM_008389325.2	AT5G65790	MYB68	1.18533
103418570	1039916813	XM_008356682.2	AT2G38750	ANNAT4	1.18773
103433453	1039875443	XM_008371717.2	AT2G37790	AKR4C10	1.19037
103413146	1039909230	XM_008351636.2	AT5G12470	AT5G12470	1.1928
103426381	658053877	XM_008364477.1	AT3G55120	TT5	1.19384
103435356	1039880465	XM_008373745.2	AT1G16390	OCT3	1.19406
103427427	1039928715	XM_008365478.2	AT1G05840	AT1G05840	1.19428
103433729	1039875768	XM_008372002.2	AT2G38410	AT2G38410	1.19742
103445646	1039829657	XM_008384662.2	AT1G06620	AT1G06620	1.19764
103419438	1039917934	XM_008357541.2	AT5G27760	AT5G27760	1.19809
103406241	1039896027	XM_008345244.2	AT5G54160	OMT1	1.19931
103451481	1039844619	XM_008390880.2	AT3G11920	AT3G11920	1.20312
103423267	1039923036	XM_008361335.2	AT3G57330	ACA11	1.20795
103432552	1039874643	XM_008370743.2	AT1G02920	GSTF7	1.21107
103407991	1039899460	XM_008346865.2	AT4G27410	RD26	1.21324
103405112	1039861450	XM_008344077.2	AT5G41920	AT5G41920	1.21568
103429188	1039931040	XM_008367328.2	AT3G49650	AT3G49650	1.2175
103432598	1039874725	XM_008370796.2	AT2G47590	PHR2	1.22102
103441150	1039823517	XM_008379885.2		NA	1.22223
103436968	1039882079	XM_008375430.2	AT4G17030	EXLB1	1.2234
103404670	1039864253	XM_008343604.2	AT3G02360	AT3G02360	1.22369
103441209	1039889640	XM_008379908.2	AT1G18210	AT1G18210	1.22625
103422828	1039922479	XM_017328830.1	AT3G45780	PHOT1	1.22826
103448629	1039837392	XM_008387893.2	AT1G22410	AT1G22410	1.22948
103422635	1039922158	XM_008360688.2	AT5G24910	CYP714A1	1.23068
103447526	1039837504	XM_008386727.2	AT2G29060	AT2G29060	1.23171
103455704	1039847280	XM_008395290.2	AT5G23130	AT5G23130	1.23248
103423789	1039871674	XM_008361871.2	AT5G22850	AT5G22850	1.23539
103447006	1039837008	XM_008386179.2	AT3G13620	PUT4	1.23774
103433405	1039875351	XM_008371662.2	AT2G28840	XBAT31	1.24182
103455115	1039845656	XM_017337249.1	AT3G55700	AT3G55700	1.24259
103402628	1039860981	XM_008341369.2	AT5G38110	ASF1B	1.24407
103406677	1039896878	XM_008345665.2	AT3G54540	GCN4	1.24408
103452951	1039844531	XM_008392473.2	AT5G01410	RSR4	1.24531
103448249	1039837961	XM_008387500.2	AT5G13210	AT5G13210	1.24736
103452656	1039842614	XM_008392188.2	AT3G06490	MYB108	1.24802
103431846	1039934551	XM_008370017.2	AT1G26810	GALT1	1.24828
103434870	1039877589	XM_017332036.1	AT4G35540	AT4G35540	1.24851
103445653	1039832942	XM_008384670.2	AT1G17500	AT1G17500	1.2487
103438249	1039883320	XM_008376774.2	AT1G36160	ACC1	1.25014
103437857	1039881775	XM_008376363.2	AT1G74360	AT1G74360	1.25267
103446786	1039833155	XM_008385924.2		NA	1.25619
103409994	1039903425	XM_008348768.2	AT2G22250	ATAAT	1.25637
103449480	1039839301	XM_008388803.2	AT2G30830	AT2G30830	1.25748
103406852	1039896876	XM_017324535.1	AT4G14305	AT4G14305	1.25783
103431825	1039934643	XM_008369993.2	AT3G49690	MYB84	1.25794
103404424	1039864841	XM_008343331.2	AT5G15140	AT5G15140	1.26003
103424688	1039924992	XM_017329369.1	AT1G47380	AT1G47380	1.26238
103405764	1039868759	XM_008344789.2	AT1G08500	ENODL18	1.2625
103419873	1039918476	XM_008357961.2	AT5G03380	AT5G03380	1.26385
103445275	1039831169	XM_017334862.1	AT1G47670	AT1G47670	1.26439
103444105	1039893707	XM_017334392.1	AT2G31010	AT2G31010	1.26449
103428733	1039930448	XM_008366856.2	AT2G17290	CPK6	1.26773
103440547	1039890614	XM_017333818.1		FAM9A	1.26881
103444670	1039824305	XM_008383623.2		NA	1.26937
103438489	1039885991	XM_008377030.2		NA	1.27078
103452239	1039844695	XM_017337098.1		CML25	1.2709
103453158	1039843151	XM_008392712.2		At3g12360	1.27135
103453535	1039842596	XM_008393070.2	AT1G51800	IOS1	1.274
103452014	1039844800	XM_008391486.2	AT1G10740	AT1G10740	1.27451
103440566	1039889338	XM_008379266.2		NA	1.27645
103434807	1039826645	XM_008373161.2	AT2G28710	ZAT12	1.27689
103440651	1039891916	XM_008379346.2	AT5G03300	ADK2	1.27871
103434399	1039880140	XM_008372740.2	AT5G47770	FPS1	1.27927
103438873	1039885751	XM_008377416.2		NPC3	1.27938
103453197	1039865601	XM_008392748.2	AT5G56780	ET2	1.28353
103427984	1039929490	XM_008366070.2	AT5G47770	FPS1	1.28732
103418130	1039916036	XM_008356276.2	AT2G25060	ENODL14	1.28774
103429192	1039931044	XM_008367331.2	AT5G48230	ACAT2	1.29196
103448572	1039837159	XM_008387839.2	AT4G27290	AT4G27290	1.29278
103450670	1039867093	XM_008390046.2	AT5G12010	AT5G12010	1.29326
103405132	1039862308	XM_008344095.2	AT3G59030	TT12	1.29438
103405965	1039865434	XM_008344993.2	AT4G01840	KCO5	1.29581
103434363	1039826522	XM_008372700.2	AT2G28710	ZAT12	1.2976
103414031	1039910464	XM_008352450.2	AT5G16440	IPP1	1.30229
103433841	1039876542	XM_008372128.2	AT5G46830	NIG1	1.30616
103417109	1039915025	XM_008355309.2	AT3G25810	TPS24	1.3071
103401044	1039853389	XM_017323362.1	AT4G35880	AT4G35880	1.30994
103431655	657954485	XM_008369832.1	AT2G46150	AT2G46150	1.31087
103405919	1039861516	XM_008344944.2		NA	1.31781
103416477	1039914391	XM_008354719.2		CYP749A22	1.31904
103400440	1039848456	XM_008339091.2	AT5G20120	AT5G20120	1.31996
103403116	1039860761	XM_008341939.2	AT1G13460	AT1G13460	1.32018
103416428	1039914223	XM_008354674.2	AT1G22930	AT1G22930	1.32084
103416716	1039914595	XM_008354942.2	AT5G49460	ACLB-2	1.32303
103444755	1039832947	XM_008383704.2	AT4G11820	HMGS	1.3266
103438726	657967618	XM_008377272.1		NA	1.32842
103439681	1039887870	XM_017333439.1	AT1G65850	AT1G65850	1.3317
103404368	1039864961	XM_008343268.2		PER63	1.33247
103453949	1039846026	XM_008393544.2	AT2G27690	CYP94C1	1.33771
103441585	1039891011	XM_017333865.1		EXT3	1.33856
103435165	1039879740	XM_008373557.2	AT1G72280	ERO1	1.33936
103451976	1039845120	XM_008391435.2	AT1G60420	AT1G60420	1.33993
103404047	1039853972	XM_008342903.2	AT5G49360	BXL1	1.34045
103436462	1039877917	XM_008374887.2	loc_os09g2942012009.m06093proteinqueuinetRNA-ribosyltransferase,putative,expressedtgtTgtnooriginaldescription'	NA	1.34946
103436104	1039878056	XM_008374518.2	AT5G50080	ERF110	1.34989
103434430	1039879479	XM_008372780.2	AT5G47560	TDT	1.35332
103427803	1039872346	XM_008365887.2		SD1.8	1.35718
103402798	1039854242	XM_008341554.2	AT1G13530	AT1G13530	1.3605
103455622	1039845265	XM_008395198.2	AT1G18210	AT1G18210	1.3624
103452956	1039843765	XM_008392479.2	AT1G78380	GSTU19	1.36897
103405539	1039861563	XM_008344552.2	AT2G42610	LSH10	1.36943
103446400	1039866431	XM_008385510.2	AT4G02600	MLO1	1.36976
103417538	1039915516	XM_008355715.2	AT1G35720	ANNAT1	1.37
103451955	1039843786	XM_017336961.1	AT1G23800	ALDH2B7	1.37214
103405757	1039861431	XM_017323845.1		At1g61500	1.37316
103435394	1039826791	XM_008373785.2	AT3G55580	AT3G55580	1.38042
103450949	1039841113	XM_008390357.2	AT5G27450	MVK	1.38322
103434734	1039879543	XM_017332410.1	AT1G61210	DWA3	1.38765
103438110	1039881400	XM_008376653.2	AT1G73500	MKK9	1.39062
103404483	1039862337	XM_008343401.2	AT5G39090	AT5G39090	1.39235
103401876	1039849933	XM_008340591.2	AT1G36940	AT1G36940	1.39282
103406806	1039897154	XM_008345795.2	AT2G19570	CDA1	1.39377
103447380	1039834682	XM_008386567.2	AT1G76390	PUB43	1.39615
103438446	1039885540	XM_008376988.2	AT5G19440	AT5G19440	1.3967
103452632	1039843841	XM_008392153.2	AT1G02500	SAM1	1.40309
103440232	1039890687	XM_008378902.2		NA	1.4035
103421680	1039920755	XM_017328474.1	AT3G21630	CERK1	1.40443
103410672	1039904511	XM_017325611.1	AT1G75820	CLV1	1.40838
103420081	1039918754	XM_008358142.2	AT2G41430	ERD15	1.41683
103409925	1039865849	XM_017336360.1	AT3G09270	GSTU8	1.41803
103449568	1039841521	XM_008388894.2	AT3G11820	SYP121	1.41924
103455679	1039846024	XM_008395260.2		GLP6	1.41928
103447993	1039866624	XM_008387229.2	AT2G25060	ENODL14	1.41962
103411521	658025908	XM_008350147.1		NA	1.42812
103445446	1039833585	XM_008384452.2		GSTU	1.43073
103435806	657961700	XM_008374224.1	AT2G33150	PKT3	1.43355
103443270	1039893511	XM_017334321.1	AT5G64300	GCH	1.43663
103405949	1039864754	XM_008344980.2	AT4G01870	AT4G01870	1.43734
103420552	1039919285	XM_017328133.1	AT5G61890	AT5G61890	1.43933
103440652	1039891240	XR_530122.2	AT3G53260	PAL2	1.44105
103407926	1039899282	XM_008346799.2		SD1.8	1.44233
103449761	1039838964	XM_008389086.2	AT2G41690	HSFB3	1.44456
103404573	1039862527	XM_008343502.2	AT5G14760	AO	1.44665
103409539	1039869493	XM_008348365.2	AT3G26040	AT3G26040	1.45087
103418114	1039916226	XM_017327517.1	AT5G57870	eIFiso4G1	1.45573
103448359	1039866062	XM_008387614.2	AT5G20050	AT5G20050	1.45726
103428151	1039929706	XM_008366250.2	AT1G76360	AT1G76360	1.45903
103401382	1039848506	XM_008340099.2	AT5G67050	AT5G67050	1.46387
103436609	1039878217	XM_017332127.1	AT1G02170	MC1	1.47077
103445616	657981651	XM_008384630.1	AT1G04430	AT1G04430	1.47242
103444125	1039895474	XM_008383040.2	AT5G16110	AT5G16110	1.47695
103405413	1039862833	XM_008344414.2	AT1G72540	AT1G72540	1.48004
103454551	1039847481	XM_008394141.2	AT2G41430	ERD15	1.48165
103430847	1039933206	XM_008368984.2	AT1G06650	AT1G06650	1.48348
103424962	1039925349	XM_017329453.1		RPS6	1.4836
103455795	1039853855	XM_008395384.2	AT4G10720	AT4G10720	1.48581
103412173	1039907632	XM_008350768.2	AT3G07090	AT3G07090	1.4873
103407916	658019323	XM_008346792.1	AT5G55630	KCO1	1.48735
103436475	657963050	XM_008374904.1	AT1G50090	BCAT7	1.48961
103451221	1039840149	XM_008390652.2	AT3G51680	SDR2	1.48998
103428961	1039930750	XM_008367097.2	AT2G40890	CYP98A3	1.49062
103448960	1039835147	XM_008388220.2		NA	1.49369
103444293	1039895328	XM_008383230.2	AT5G26751	SK11	1.4946
103405859	1039865151	XM_008344874.2	AT2G30970	ASP1	1.49638
103431295	1039933985	XM_008369434.2	AT1G34300	AT1G34300	1.49951
103453231	1039843551	XM_008392778.2	AT3G22800	AT3G22800	1.50001
103436766	1039884311	XM_017333021.1	AT4G19420	PAE8	1.50185
103452251	1039842953	XM_008391765.2	AT1G15000	scpl50	1.50223
103430794	1039933117	XM_017331057.1	AT5G05580	FAD8	1.50233
103452841	1039843574	XM_008392376.2	MAL12_MALDOMajorallergenMald1(MaldI	Mald1	1.50363
103452775	1039844119	XM_008392311.2	AT5G49460	ACLB-2	1.5048
103438689	1039888500	XM_008377237.2		NA	1.5091
103452680	1039843070	XM_017336819.1	AT2G39200	MLO12	1.51639
103417999	1039916055	XM_008356157.2	AT4G17486	AT4G17486	1.51667
103448502	1039835034	XM_008387760.2	AT5G07990	CYP736A12	1.51915
103434866	1039880248	XM_008373231.2	AT1G29050	TBL38	1.51953
103415754	1039913366	XM_008354048.2	AT2G26650	AKT1	1.51994
103405933	1039862364	XM_008344962.2	AT1G02400	GA2OX6	1.52525
103447197	1039837675	XM_008386376.2	AT5G47770	FPS1	1.52587
103407469	1039898422	XM_008346402.2	AT1G51410	AT1G51410	1.52604
103400403	1039847850	XM_008339052.2	AT2G25060	ENODL14	1.52986
103425562	1039926162	XM_017329623.1	AT3G29575	AFP3	1.53056
103426351	1039927218	XM_008364446.2	AT3G54850	PUB14	1.53937
103431360	1039872982	XM_008369512.2		NA	1.53972
103444230	1039893213	XM_008383153.2		ODORANT1	1.54444
103437081	1039884510	XM_008375540.2		NEP2	1.54466
103406879	1039897234	XM_008345857.2	AT5G20230	BCB	1.54564
103441037	1039889036	XM_017333558.1	AT4G21410	CRK29	1.54565
103430768	1039933094	XM_008368912.2	MAL12_MALDOMajorallergenMald1(MaldI	MAL12_MALDO	1.55591
103420792	1039919610	XM_017328209.1	AT5G53130	CNGC1	1.55708
103441677	1039890394	XM_008380376.2	AT5G65520	AT5G65520	1.55713
103452494	1039866721	XR_001785760.1	AT5G36930	AT5G36930	1.56114
103415428	1039912882	XM_008353761.2	AT1G34300	PK1	1.56877
103449926	1039840735	XM_008389253.2		NA	1.57001
103416185	1039913909	XM_008354443.2	AT1G22040	AT1G22040	1.57854
103424358	1039924563	XM_008362445.2	AT2G41690	HSFB3	1.58294
103441965	1039891667	XM_008380681.2		CYP98A2	1.58467
103442526	1039892563	XM_008381326.2		NA	1.58918
103416714	1039914593	XM_008354940.2	AT1G47980	AT1G47980	1.59733
103418872	1039917200	XM_008356980.2	AT5G60700	AT5G60700	1.60026
103452835	1039844311	XM_008392371.2	MAL12_MALDOMajorallergenMald1(MaldI	MAL12_MALDO	1.60235
103437352	1039884680	XM_008375819.2	AT3G61220	SDR1	1.60254
103434849	1039879035	XM_008373212.2	AT5G47220	ERF2	1.60316
103401302	1039849957	XM_008340014.2	AT2G15220	AT2G15220	1.60722
103404043	1039859233	XM_008342898.2	AT3G23240	ERF1	1.60781
103404279	1039863133	XM_008343173.2	AT5G40460	AT5G40460	1.60912
103416643	1039914258	XM_008354874.2	AT1G14185	AT1G14185	1.61463
103410193	1039903709	XM_008348937.2	AT2G46270	GBF3	1.61527
103451277	657993284	XM_008390701.1	AT4G36430	AT4G36430	1.61816
103423913	1039923977	XM_008361988.2	AT1G16250	AT1G16250	1.62108
103430004	1039932094	XM_008368138.2	AT2G28470	BGAL8	1.62484
103450146	1039838622	XM_008389456.2	AT3G09600	RVE8	1.62556
103424565	1039823687	XM_017334790.1	AT2G14960	GH3.1	1.62643
103447870	1039836154	XM_008387075.2	AT2G28470	BGAL8	1.62705
103445251	1039830892	XM_008384246.2	AT2G17040	NAC036	1.63076
103424908	1039925290	XM_008362995.2		BAM3	1.63084
103409159	1039901732	XM_008347972.2		GSTU	1.63109
103401729	1039852529	XM_008340450.2	AT1G77380	AAP3	1.63161
103400538	1039849367	XM_008339192.2	AT2G26650	AKT1	1.63477
103402688	1039854953	XM_008341439.2		NA	1.63918
103436357	1039880841	XM_008374777.2	AT1G78280	AT1G78280	1.64345
103415456	1039913068	XM_017326878.1	AT3G16500	PAP1	1.644
103441672	1039889331	XM_008380368.2		NA	1.64619
103410572	1039904407	XM_008349256.2	AT2G38970	AT2G38970	1.6489
103415822	1039913435	XM_017326932.1	AT3G06880	AT3G06880	1.65683
103400327	1039852580	XM_008338977.2		CRK16	1.65995
103408131	1039899745	XM_008346997.2	AT3G16770	EBP	1.66227
103455683	1039845361	XM_008395262.2	AT3G17700	CNBT1	1.6632
103454965	1039847177	XM_008394555.2	AT5G50380	EXO70F1	1.66324
103426655	1039927627	XM_008364739.2	AT4G15450	AT4G15450	1.66552
103445323	1039832212	XM_008384317.2	AT2G15220	AT2G15220	1.6688
103427006	1039928146	XM_017330022.1	AT5G19440	AT5G19440	1.66914
103450680	1039838992	XM_008390053.2	AT2G38290	ATAMT2	1.67038
103452347	657995459	XM_008391844.1	AT1G27100	AT1G27100	1.676
103443180	1039828741	XM_008381983.2	AT1G01490	AT1G01490	1.68205
103442308	1039894640	XM_017334564.1	AT1G59650	CW14	1.68499
103452842	1039843578	XM_008392377.2	MAL12_MALDOMajorallergenMald1(MaldI	MAL12_MALDO	1.68503
103413760	1039909969	XM_008352199.2	AT1G52700	AT1G52700	1.68539
103443059	657976364	XM_008381846.1		NA	1.68587
103432413	1039874510	XM_008370599.2	AT3G51895	SULTR3.1	1.68641
103426485	1039927370	XM_008364564.2	AT1G01490	AT1G01490	1.68652
103418383	657951854	XM_008356517.1	AT5G05340	PRX52	1.68735
103413596	1039909768	XM_008352056.2	AT5G19450	CDPK19	1.691
103451027	1039840822	XM_008390452.2	AT1G60710	ATB2	1.69149
103453569	658309466	NM_001293981.1	AT3G13790	BFRUCT1	1.69681
103437427	1039884747	XM_008375897.2	AT1G64660	MGL	1.69933
103433020	1039874831	XM_008371245.2	AT1G63120	RBL2	1.69947
103407947	1039899345	XM_008346825.2	AT4G26910	AT4G26910	1.70262
103436196	1039877658	XM_008374623.2	AT5G42340	PUB15	1.70336
103418043	1039916139	XM_008356195.2	AT4G15450	AT4G16260	1.71104
103412278	657950674	XM_008350870.1		NA	1.71218
103455344	1039846737	XM_008394924.2		NA	1.71574
103423066	1039871548	XM_017328091.1	AT5G60700	AT5G60700	1.71867
103411644	1039906582	XM_017325845.1		ABCG35	1.72571
103439418	1039888336	XM_008377987.2	AT1G01120	KCS1	1.72934
103434626	1039878302	XM_017332137.1	AT4G23180	CRK10	1.73307
103449530	1039839363	XM_008388857.2	AT3G52780	PAP20	1.73349
103406632	1039896786	XM_017324516.1		NA	1.73449
103437984	1039884722	XM_008376517.2	AT5G07990	TT7	1.73566
103425934	1039825983	XM_008364059.2	AT2G39210	AT2G39210	1.7368
103431959	1039826175	XM_008370161.2	AT2G39220	PLP6	1.739
103427148	1039928351	XM_008365219.2	AT1G66700	PXMT1	1.73915
103424362	1039924565	XM_017329287.1	AT4G37050	PLP4	1.74115
103444243	1039829120	XM_008383167.2	AT2G46620	AT2G46620	1.74168
103403151	1039868400	XM_008341982.2	AT4G36945	AT4G36945	1.74191
103432289	1039874428	XM_008370477.2	AT3G63380	AT3G63380	1.74381
103443264	1039895227	XM_008382081.2	AT5G26340	MSS1	1.74625
103437220	1039884388	XM_008375689.2	AT1G48880	TBL7	1.74766
103440154	657970565	XM_008378818.1	AT5G53130	CNGC1	1.74907
103434002	1039876190	XM_008372315.2	AT3G06350	MEE32	1.76138
103447749	1039837881	XM_008386945.2	AT5G59790	AT5G59790	1.76273
103452844	1039843576	XM_008392379.2	MAL12_MALDOMajorallergenMald1(MaldI	Mald1	1.76998
103451256	1039867234	XM_008390685.2	AT5G20680	TBL16	1.77189
103435177	1039878316	XM_008373573.2		NA	1.77777
103425667	1039926349	XM_008363755.2	AT3G21550	DMP2	1.77795
103413892	1039910238	XM_008352332.2	AT4G08250	AT4G08250	1.7798
103420666	1039919469	XM_008358717.2	AT4G10490	AT4G10490	1.78386
103448900	1039837256	XM_008388157.2	AT1G71697	CK1	1.78393
103421913	1039921193	XM_008359955.2	AT3G03210	AT3G03210	1.78517
103409064	658021421	XM_008347883.1		NA	1.78791
103444691	1039831292	XM_008383646.2		NA	1.79243
103443198	658309651	NM_001294137.1	AT3G23730	BRU1	1.79615
103404362	1039865309	XM_008343263.2	AT3G28180	CSLC04	1.79871
103437261	1039882904	XM_008375734.2		NA	1.80258
103447705	1039866577	XM_008386895.2	AT5G34930	AT5G34930	1.80418
103419495	1039918019	XM_008357594.2	AT5G56750	NDL1	1.80452
103451064	1039839450	XM_008390493.2	AT3G04520	THA2	1.80452
103444141	1039894272	XM_008383054.2	AT5G38210	AT5G38210	1.80594
103426955	1039928064	XM_017330003.1	AT5G04930	ALA1	1.80597
103417208	1039915129	XM_008355399.2	AT1G22380	UGT85A3	1.80897
103434189	1039877098	XM_008372503.2		NA	1.81128
103405299	1039863081	XM_017324100.1	AT4G08850	AT4G08850	1.81623
103455222	1039825489	XM_008394846.2	AT3G18830	PMT5	1.81816
103427010	1039928150	XM_008365087.2	AT5G19440	AT5G19440	1.8282
103430184	1039932332	XM_008368320.2	AT3G51895	SULTR3.1	1.83133
103450195	1039838961	XM_008389505.2		NA	1.832
103420705	1039919507	XM_008358751.2		NA	1.83685
103405603	1039862319	XM_008344613.2	AT5G64810	WRKY51	1.84069
103437841	1039884176	XM_008376344.2	AT1G74380	XXT5	1.84195
103435501	657961069	XM_008373899.1		NA	1.84725
103427815	1039929270	XM_008365895.2	AT4G23180	CRK10	1.85305
103456239	1039848301	XM_008395919.2		NA	1.85354
103455951	1039848779	XM_008395564.2	AT5G42830	AT5G42830	1.85705
103443776	657977939	XM_008382670.1	AT3G16340	ABCG29	1.86513
103408271	1039899998	XR_001786627.1	AT4G23060	IQD22	1.86556
103411915	1039907078	XM_008350531.2	AT5G54160	OMT1	1.86987
103452836	657996449	XM_008392372.1	MAL12_MALDOMajorallergenMald1(MaldI	MAL12_MALDO	1.87049
103426504	1039927407	XM_008364586.2	AT5G05840	AT5G05840	1.87809
103450666	1039841505	XM_008390039.2	AT5G36110	CYP716A1	1.88124
103450699	1039867103	XM_008390079.2	AT5G57050	ABI2	1.88247
103429368	1039931247	XM_017330651.1		At4g00960	1.88529
103402868	1039854911	XM_008341646.2	AT2G03220	FT1	1.8879
103402269	1039852745	XM_008341008.2	AT4G14090	AT4G14090	1.89088
103449241	657989120	XM_008388526.1		NA	1.89831
103427614	1039928990	XM_008365682.2		LAC7	1.89987
103410171	658023479	XM_008348921.1		NA	1.9011
103419371	658040222	XM_008357485.1	AT5G54160	OMT1	1.90333
103451203	1039839896	XM_017336286.1	AT1G45616	RLP6	1.90435
103412494	1039908179	XM_008351045.2	AT1G11340	AT1G11340	1.9065
103451917	1039842123	XM_008391362.2	AT1G51760	IAR3	1.91048
103443888	1039894099	XM_008382786.2	AT3G54220	SCR	1.91704
103429646	658060331	XM_008367779.1	AT1G21230	WAK5	1.91747
103411254	1039906055	XM_008349900.2	AT2G20900	DGK5	1.91907
103439452	1039885261	XM_008378016.2	AT5G54160	OMT1	1.93382
103421017	1039919894	XM_008359051.2	AT1G80840	WRKY40	1.93413
103438934	658309641	NM_001293919.1	AT4G17500	ERF-1	1.93778
103412975	1039909037	XM_017326172.1		At1g07440	1.94089
103401072	657948485	XM_008339783.1		NA	1.9519
103412578	1039908338	XM_008351121.2		CRK10	1.95237
103452043	1039844137	XM_008391518.2	AT3G55270	MKP1	1.95415
103452838	1039842733	XM_008392373.2	MAL12_MALDOMajorallergenMald1(MaldI	Mald1	1.95653
103409759	1039902941	XM_008348554.2		FERONIA	1.95856
103413718	1039866292	XM_008352160.2	AT3G51930	AT3G51930	1.95871
103401235	1039852716	XM_008339946.2	AT4G36790	AT4G36790	1.9599
103453478	1039866112	XM_008393021.2	AT1G55850	CSLE1	1.96575
103433681	1039875693	XM_008371951.2	AT5G01550	LECRKA4.2	1.97165
103408136	1039899750	XM_008347003.2	PRS2_SOLTUPathogenesis-relatedproteinSTH-2-Solanumtuberosum(Potato	PRS2	2.00726
103445655	1039830845	XM_008384672.2	AT4G39830	AT4G39830	2.00777
103453105	1039841998	XM_008392647.2	AT5G26340	MSS1	2.00901
103410077	1039903510	XM_008348846.2	AT2G36690	AT2G36690	2.01105
103433133	1039874816	XM_008371365.2	AT5G13870	XTH5	2.01388
103452067	1039841967	XM_008391549.2	AT3G26090	RGS1	2.01428
103431786	1039934468	XM_008369956.2	AT3G02430	AT3G02430	2.01985
103447984	1039866622	XM_017322739.1	AT5G20230	BCB	2.02245
103455946	1039848611	XM_008395559.2	AT4G06536	AT4G06536	2.03223
103410840	1039904888	XM_008349498.2	AT1G22360	UGT85A2	2.03413
103419466	1039917984	XM_008357560.2	AT5G24910	CYP714A1	2.03436
103423968	1039924051	XM_008362042.2	MAL12_MALDOMajorallergenMald1(MaldI	MAL12_MALDO	2.03866
103431664	657954487	XM_008369841.1		NA	2.04386
103453933	1039845706	XR_001792083.1	AT5G03720	HSFA3	2.06
103406844	1039868968	XM_008345826.2	AT3G60190	DL1E	2.06319
103443075	1039893484	XM_017334310.1	AT2G04160	AIR3	2.0649
103439347	1039827602	XM_017333748.1		TPPA	2.07026
103452169	1039842469	XM_008391676.2	AT5G13080	WRKY75	2.07156
103419497	1039918024	XM_008357597.2	AT4G14746	AT4G14746	2.07592
103446504	1039832192	XM_008385640.2	AT1G76690	OPR2	2.08042
103422259	1039921625	XM_017328669.1	AT4G39830	AT4G39830	2.08991
103403338	658010259	XM_008342150.1		ATJ20	2.09151
103401770	1039848656	XM_008340490.2		NA	2.09584
103424699	1039925004	XM_008362796.2	AT5G25880	NADP-ME3	2.09602
103433950	1039876108	XM_008372255.2	AT1G55020	LOX1	2.10648
103422036	1039921358	XM_008360075.2	AT5G54160	OMT1	2.1073
103420604	1039919391	XM_008358661.2	AT5G60900	RLK1	2.11207
103431532	1039934118	XM_008369697.2	AT3G28345	AT3G28345	2.1146
103433949	658309395	NM_001294101.1	AT1G55020	LOX1	2.11538
103431313	1039933801	XM_008369459.2	AT5G25880	NADP-ME3	2.11613
103435157	658309653	NM_001294005.1	AT2G39690	AT2G39690	2.13721
103450515	1039838611	XM_008389879.2	AT3G54040	AT3G54040	2.13722
103442157	1039894909	XM_008380919.2		LHT1	2.13966
103423027	1039922714	XM_008361098.2	AT1G22360	UGT85A2	2.14091
103452840	1039843579	XM_008392374.2	MAL12_MALDOMajorallergenMald1(MaldI	MAL12_MALDO	2.14297
103402218	1039848664	XM_008340963.2	AT1G76690	OPR2	2.14452
103413880	1039910099	XM_008352319.2	AT5G01210	AT5G01210	2.14904
103404781	1039861785	XM_008343742.2	AT3G25810	AT3G25810	2.15624
103447600	1039836464	XM_008386795.2	AT5G58400	AT5G58400	2.16464
103421112	658043464	XM_008359148.1	AT4G38830	CRK26	2.17315
103422279	1039921671	XM_008360326.2	AT1G47480	AT1G47480	2.17979
103452937	1039842687	XM_008392465.2	AT5G01380	AT5G01380	2.17986
103414315	1039910628	XM_008352713.2		UGT73D1	2.1817
103412656	1039908553	XM_008351198.2	AT1G58170	AT1G58170	2.1863
103421745	1039920908	XM_008359788.2	AT1G61480	AT1G61480	2.1907
103420533	1039919302	XM_008358593.2		FOX5	2.19895
103443642	1039894098	XM_008382529.2		AGP9	2.20793
103423083	1039922788	XM_008361151.2	AT4G14640	CAM8	2.20849
103425011	1039925423	XM_008363096.2		NA	2.20925
103404453	1039863431	XM_008343365.2	AT5G39670	AT5G39670	2.21053
103411956	1039907195	XM_008350566.2	AT1G66920	AT1G66920	2.21625
103452447	1039842557	XM_008391936.2	AT1G55230	AT1G55230	2.21665
103409777	1039902968	XM_008348568.2	AT4G36220	FAH1	2.21707
103448328	1039836660	XM_008387571.2	AT3G13080	ABCC3	2.2282
103446500	1039832245	XM_008385636.2	AT1G76690	OPR2	2.22876
103421459	1039920524	XM_008359499.2	AT5G40690	AT5G40690	2.23476
103424356	1039924561	XM_008362443.2		BBE1	2.24321
103411724	658026312	XM_008350359.1	AT1G06410	TPS7	2.24324
103402960	1039866166	XM_008341751.2		NA	2.24784
103400438	1039852034	XM_008339088.2	AT2G26830	emb1187	2.24901
103400713	1039849091	XM_008339376.2	AT3G28345	AT3G28345	2.25424
103450600	1039841718	XM_008389967.2	AT5G01210	AT5G01210	2.26423
103441059	1039825295	XM_008379786.2		At1g64065	2.26466
103443482	1039894955	XM_008382342.2	AT2G32800	AP4.3A	2.26737
103416926	1039914780	XM_008355131.2	AT5G54160	OMT1	2.27236
103431632	1039934241	XM_008369803.2	AT4G39330	CAD9	2.27921
103411451	1039906169	XM_017325806.1	AT5G59810	SBT5.4	2.28275
103453496	1039867255	XM_017323599.1	AT4G23990	CSLG3	2.29229
103434645	1039881243	XM_008373000.2	AT5G54500	FQR1	2.29411
103442597	1039894095	XM_008381404.2	AT2G32380	AT2G32380	2.2986
103435086	1039879224	XM_008373479.2	AT5G46060	AT5G46060	2.30014
103417080	1039915033	XM_008355284.2	AT3G02210	COBL1	2.30397
103423966	1039924050	XM_008362039.2	MAL12_MALDOMajorallergenMald1(MaldI	Mald1	2.30677
103443848	1039893255	XM_008382747.2	AT1G47670	AT1G47670	2.30929
103434157	1039876282	XM_008372469.2	AT4G14746	AT4G15450	2.31647
103429191	1039931068	XM_008367330.2	AT2G25000	WRKY60	2.31892
103454789	1039823571	XM_008394411.2		NA	2.32462
103439089	1039886302	XM_017333233.1	AT4G27290	AT4G27290	2.32603
103427712	1039929119	XM_017330207.1	AT1G76690	OPR2	2.3307
103442280	1039895299	XM_008381055.2	AT3G28180	CSLC04	2.33315
103416301	1039914060	XM_008354560.2	AT5G54160	OMT1	2.34958
103448628	1039837171	XM_017335865.1	AT1G78280	AT1G78280	2.35084
103437308	1039882539	XM_008375785.2	AT5G20230	BCB	2.35363
103437960	1039884191	XM_008376492.2	AT1G68710	AT1G68710	2.35765
103422534	1039921956	XM_008360601.2	AT5G47650	NUDT2	2.36204
103414723	1039911372	XM_008353089.2	AT3G23240	ERF1	2.37471
103427739	1039929206	XM_008365810.2	AT3G22930	CML11	2.37544
103441577	1039892141	XM_008380258.2	AT1G44350	ILL6	2.3757
103446634	1039831826	XM_008385769.2		At1G11410	2.38298
103453750	1039842870	XM_008393318.2	AT4G31940	CYP82C4	2.39843
103446076	1039866376	XM_017337408.1	AT2G22750	AT2G22750	2.41396
103427782	1039929255	XM_008365852.2	AT5G55340	AT5G55340	2.41914
103428350	1039873213	XM_008366458.2		WRKY31	2.42681
103423368	1039923141	XM_017328968.1	AT2G37040	pal1	2.43662
103404148	1039861813	XM_008343031.2	AT5G13200	AT5G13200	2.43853
103417927	1039916295	XM_008356082.2	AT4G35160	AT4G35160	2.43917
103405269	1039863568	XM_008344244.2	AT3G22060	AT3G22060	2.44123
103447995	1039835003	XM_008387230.2		CYP716A52v2	2.44327
103438447	1039885542	XM_008376989.2	AT5G19440	AT5G19440	2.44496
103405050	1039862334	XM_008344020.2	AT5G47650	NUDT2	2.45147
103441452	1039890326	XM_017333763.1	AT1G22400	UGT85A1	2.45537
103422086	1039871392	XM_008360128.2	AT5G60540	PDX2	2.46079
103409584	1039902423	XM_008348400.2	AT5G20230	BCB	2.46084
103447716	1039837533	XM_008386907.2	AT2G28840	XBAT31	2.46473
103445248	1039829904	XM_008384244.2	AT3G45970	EXLA1	2.46686
103406668	1039897332	XM_008345654.2	AT4G35160	AT4G35160	2.47006
103444067	1039892972	XM_008382977.2	AT5G05340	PRX52	2.48133
103414583	1039911105	XM_008352950.2	MAL12_MALDOMajorallergenMald1(MaldI	Mald1	2.48979
103401733	1039848946	XM_008340456.2	AT1G11050	AT1G11050	2.49696
103444078	1039829074	XM_008382994.2		NA	2.49956
103431212	657954394	XM_008369351.1	AT5G10530	AT5G10530	2.5035
103409320	1039902040	XM_008348128.2	AT1G58440	XF1	2.50664
103412373	1039907864	XM_017326010.1		NA	2.52697
103411699	1039906690	XM_008350333.2		PoxN1	2.53346
103450046	1039840758	XM_008389362.2	AT2G37040	pal1	2.53496
103445348	1039832158	XM_008384345.2	AT5G48540	AT5G48540	2.54572
103452004	1039843857	XM_008391476.2		CRK2	2.56095
103424195	658049611	XM_008362281.1		YLS9	2.56593
103436547	1039880798	XM_008374981.2	AT2G36690	AT2G36690	2.56753
103442691	1039893969	XM_008381510.2		AHL26	2.57117
103406962	1039897206	XM_017324565.1	AT4G24000	CSLG2	2.5811
103436210	657962516	XM_008374632.1	AT3G26040	AT3G26040	2.5911
103449631	657989931	XM_008388963.1		NA	2.59634
103445744	1039833488	XM_008384767.2	AT1G52800	AOP3	2.60873
103445171	1039833405	XM_008384156.2	AT1G09970	LRRXI-23	2.60916
103423111	1039922830	XM_008361177.2	AT2G29110	GLR2.8	2.61142
103401028	1039848134	XM_008339731.2	AT1G47670	AT1G47670	2.61398
103442150	1039893855	XM_008380907.2	AT2G35930	PUB23	2.62822
103412482	1039908142	XM_017326045.1	AT5G50400	PAP27	2.63872
103444796	1039832248	XM_017335078.1		NA	2.63957
103429696	1039931654	XM_017330742.1	AT1G76680	OPR1	2.65178
103454806	1039846886	XM_008394403.2	AT1G63410	AT1G63410	2.65577
103455273	1039847385	XM_008394864.2		GLP	2.66554
103454521	1039867508	XM_008394108.2	AT3G26040	AT3G26040	2.66757
103436102	1039879117	XM_008374517.2		At2g27310	2.66771
103451588	1039842822	XM_008391002.2	AT2G01340	At17.1	2.66849
103418129	1039916314	XM_008356275.2	AT5G20230	BCB	2.67303
103435272	1039879721	XM_008373656.2		NA	2.69253
103433014	1039876295	XM_008371238.2	AT4G11650	OSM34	2.70955
103414194	1039910672	XM_008352598.2	AT3G17820	GLN1.3	2.70981
103407076	1039897638	XM_008346030.2	AT5G53760	MLO11	2.71552
108174800	1039839854	XM_017336277.1	AT4G31940	CYP82C4	2.7251
103441899	1039890771	XM_008380615.2	AT2G41480	AT2G41480	2.72902
103400019	1039852585	XM_008338700.2	AT4G19810	ChiC	2.73816
103437868	1039884336	XM_017333024.1	AT5G07920	DGK1	2.74251
103423970	1039924059	XM_008362043.2	PRS2_SOLTU	PRS2	2.7432
103440381	1039825271	XM_008379089.2	MAL12_MALDOMajorallergenMald1(MaldI	Mald1	2.74596
103439715	657969597	XM_008378301.1	AT5G52020	AT5G52020	2.74986
103411505	1039906311	XM_008350138.2	AT3G23730	XTH16	2.75089
103438401	1039824028	XM_008376956.2		At2g01680	2.75126
103447496	1039834413	XM_008386693.2	AT1G52800	AOP3	2.76043
103446463	1039830701	XM_008385585.2	AT2G29990	NDA2	2.76524
103418408	1039916617	XM_008356538.2	AT3G60810	AT3G60810	2.76921
103431581	1039874329	XM_008369748.2	AT1G78850	AT1G78850	2.76954
103409163	1039901677	XM_008347975.2	AT3G23990	HSP60	2.77678
103408562	1039900547	XM_008347401.2	AT1G79990	AT1G79990	2.77876
103405278	658014306	XM_008344252.1	AT1G16130	WAKL2	2.79166
103454572	1039845932	XM_008394172.2	AT2G41380	AT2G41380	2.80058
103428481	1039930101	XM_008366583.2	AT5G20230	BCB	2.80155
103445465	657942546	XM_008384519.1		NA	2.81484
103414972	1039911924	XM_008353329.2	AT5G10530	AT5G10530	2.82293
103431604	1039874327	XM_008369773.2	AT1G78830	AT1G78830	2.82293
103410839	1039904886	XM_008349497.2	AT1G22360	UGT85A2	2.8248
103432875	1039826183	XM_008371087.2		NA	2.83423
103401550	1039850120	XM_008340266.2	AT4G39330	CAD9	2.8401
103420059	1039918726	XM_008358121.2	AT1G58440	XF1	2.84455
103446991	1039834801	XM_008386164.2	AT4G10490	AT4G10490	2.85129
103412668	1039908480	XM_008351210.2	AT4G10490	AT4G10490	2.85361
103434354	1039876570	XM_017331784.1	AT2G19230	AT2G19230	2.85933
103423852	1039923885	XM_008361932.2		NA	2.86048
103402505	658008555	XM_008341255.1	AT5G42260	BGLU12	2.87315
103441409	1039889679	XM_008380083.2	AT4G37760	SQE3	2.87893
103409162	1039901736	XM_008347974.2		GSTU	2.88016
103436247	1039880305	XM_008374669.2	AT1G09970	LRRXI-23	2.88165
103428339	1039929891	XM_017330369.1	AT1G79990	AT1G79990	2.88167
103441386	1039891475	XM_017333931.1		MIEL1	2.8886
108173724	1039886665	XR_001790430.1		NA	2.89481
103404195	1039862361	XM_008343084.2	AT3G01900	CYP94B2	2.8986
103405264	1039862079	XM_008344240.2	AT1G22380	UGT85A3	2.90217
103421242	1039920188	XM_017328343.1	AT5G25560	MIEL1-like	2.91164
103428019	1039929558	XM_008366111.2		GSTU	2.92527
103431038	1039933411	XM_008369183.2	AT1G11340	AT1G11340	2.93115
103424691	1039925234	XM_008362788.2	AT2G26560	PLP2	2.93196
103441025	1039892079	XM_008379728.2	AT4G38830	AT4G38830	2.93418
103450583	1039839857	XM_017336278.1	AT4G31940	CYP82C4	2.95444
103429977	1039932059	XM_008368107.2	AT5G02230	AT5G02230	2.96036
103414311	1039910549	XM_017326502.1		GSTU17	2.96114
103435899	1039880252	XM_008374328.2	AT3G25250	AGC2-1	2.96122
103402689	1039854955	XM_008341440.2		NA	2.96788
103419724	1039918291	XM_017327926.1	loc_os06g2157012006.m06814proteinmyrosinaseprecursor,putative,expressednooriginaldescription'		2.97159
103426049	658053232	XM_008364136.1	AT1G19390	AT1G19390	2.97676
103421170	658043577	XM_008359204.1	AT4G31290	AT4G31290	2.98017
103447994	1039836715	XM_008387228.2		CYP716A52v2	2.98557
103449452	658309821	NM_001293958.1	AT5G03840	TFL1	2.9868
103401808	1039868161	XM_008340526.2	AT3G50740	UGT72E1	3.00494
103433614	1039876582	XM_008371884.2	AT5G01380	AT5G01380	3.01356
103402190	1039868259	XM_008340929.2		SABP2	3.031
103444591	1039829266	XM_008383549.2	AT5G16360	AT5G16360	3.03891
103447536	1039836443	XM_008386736.2	AT2G26560	PLP2	3.04883
103413526	1039909713	XM_008351992.2	AT3G11820	SYP121	3.05876
103401439	1039850012	XM_008340150.2	AT5G42930	AT5G42930	3.07407
103429692	1039931652	XM_008367825.2	PPO_MALDOPolyphenoloxidase,chloroplastprecursor(EC1.10.3.1	PPO_MALDO	3.0796
103411927	1039907060	XM_017325902.1		NA	3.08532
103437129	1039882068	XM_008375582.2	AT5G53110	AT5G53110	3.09048
103439178	1039885975	XM_008377726.2	AT3G48690	CXE12	3.09252
103437330	1039827089	XM_008375810.2	AT3G55950	CCR3	3.0973
103452567	1039866772	XM_008392074.2	AT1G65790	RK1	3.12356
103426514	1039927421	XM_008364599.2	AT5G48100	TT10	3.14267
103433549	1039876713	XM_008371813.2		LAC7	3.14642
103438445	1039827338	XM_008376991.2		GLUD2	3.14653
103428597	1039930263	XM_008366711.2	AT2G37210	LOG3	3.15112
103447446	1039838239	XM_008386633.2	AT1G73050	AT1G73050	3.15272
103450582	1039839524	XM_017336206.1	AT4G31940	CYP82C4	3.15812
103400775	1039849403	XM_008339445.2	AT5G25930	AT5G25930	3.16042
103416618	1039914297	XM_008354853.2	AT1G68760	NUDX1	3.16115
103443847	1039892885	XM_008382746.2	AT3G45290	MLO3	3.17484
103437780	1039884358	XM_008376282.2	AT1G79990	AT1G79990	3.17556
103446154	1039830906	XM_008385229.2		NA	3.20405
103411526	1039906216	XM_008350152.2	AT1G61500	AT1G61500	3.21303
103409739	658022691	XM_008348532.1	AT1G79990	AT1G79990	3.22038
103432798	1039876560	XM_017331782.1	AT5G67550	AT5G67550	3.2286
103403673	1039854145	XM_008342515.2	MAL12_MALDOMajorallergenMald1(MaldI	Mald1	3.22896
103411053	1039905410	XM_008349702.2	AT2G40890	CYP98A3	3.23561
103438021	1039882202	XM_008376559.2	AT1G70250	AT1G70250	3.23931
103405277	658014304	XM_008344251.1	AT1G16260	AT1G16260	3.24375
103445750	1039832649	XM_008384779.2	AT3G14420	GOX1	3.25341
103445360	1039824840	XM_008384362.2	AT5G24090	CHIA	3.25351
103408456	1039900373	XM_008347306.2	AT2G44840	ERF13	3.26433
103448492	1039866677	XM_008387753.2	AT1G04110	SDD1	3.26559
103446294	1039832392	XM_008385378.2	AT3G26570	PHT2;1	3.29833
103434169	1039876296	XM_008372483.2	AT3G04720	PR4	3.33631
103442120	1039893039	XM_008380876.2	AT5G13080	WRKY15	3.34052
103444016	1039893687	XM_008382924.2	AT2G41480	AT2G41480	3.35126
103414418	1039910518	XM_008352802.2	AT3G21360	AT3G21360	3.35179
103436898	1039883210	XM_008375353.2		NA	3.3557
103439201	658309502	NM_001293941.1		NA	3.36512
103433547	1039876735	XM_017331816.1	AT3G09220	LAC7	3.37648
103441519	1039891236	XM_008380195.2	AT3G16780	AT3G16780	3.37976
103428609	1039930249	XM_017330448.1		NA	3.38
103456250	1039848040	XM_008395933.2	AT5G13930	CHS	3.38143
103419426	658040309	XM_008357531.1	AT1G27040	AT1G27040	3.38216
103423780	1039923799	XM_008361858.2		CYP749A22	3.38756
103401371	1039850313	XM_008340087.2	AT4G34410	RRTF1	3.39227
103446989	1039835032	XM_008386163.2	AT4G10490	AT4G10490	3.39924
103452602	1039842119	XM_008392114.2	AT1G48320	DHNAT1	3.39972
103403698	1039857667	XM_008342538.2	AT4G17030	EXLB1	3.40597
103414926	1039911821	XM_008353283.2	AT3G11840	PUB24	3.41074
103442020	1039890494	XM_008380762.2	AT4G31940	CYP82C4	3.41834
103452577	1039865571	XM_017335359.1	AT1G11330	AT1G11330	3.41842
103412344	1039907913	XM_008350924.2		NA	3.43904
103410384	658023828	XM_008349090.1		At1g64065	3.44562
103428960	1039930749	XM_008367096.2	AT4G24280	cpHsc70-1	3.45091
103401798	1039868158	XM_008340519.2	AT3G50740	UGT72E1	3.45153
103411778	1039906911	XM_008350400.2	AT5G16340	AT5G16340	3.47176
103415736	1039913348	XM_008354031.2		NA	3.47243
103409334	1039902056	XM_017325247.1	AT2G44480	BGLU17	3.50594
103449899	1039866940	XM_008389227.2	AT4G26270	PFK3	3.50688
103415143	1039912195	XM_008353497.2	AT5G61890	AT5G61890	3.50722
103419230	1039917680	XM_008357346.2	AT1G03220	AT1G03220	3.5306
103454167	1039846638	XM_008393757.2	AT3G11840	PUB24	3.54548
103427807	1039929263	XM_008365888.2	AT4G22030	AT4G22030	3.54819
103413795	1039910015	XM_008352238.2	AT1G34300	AT1G34300	3.55269
103438258	1039883042	XM_008376792.2	AT5G37490	AT5G37490	3.55307
103416348	658034611	XM_008354605.1		ATJ20	3.55485
103448568	1039838143	XM_008387829.2	AT5G05320	AT5G05320	3.55626
103436425	1039880815	XM_008374853.2	AT2G14960	GH3.1	3.56551
103417632	1039873563	XM_008355808.2	AT5G56260	AT5G56260	3.57781
103416972	658035742	XM_008355181.1	AT2G16890	AT2G16890	3.58211
103436548	1039878947	XM_008374982.2	AT2G36690	AT2G36690	3.59056
103451996	1039842719	XM_008391458.2	AT1G23390	AT1G23390	3.59403
103402546	1039850192	XM_017323047.1	AT2G44480	BGLU17	3.59572
103406196	1039895935	XM_008345199.2	AT1G70170	MMP	3.60058
103435858	1039880850	XM_017332558.1	AT4G27870	AT4G27870	3.60335
103440476	1039825274	XM_008379204.2	MAL12_MALDOMajorallergenMald1(MaldI	Mald1	3.6132
103422099	1039921431	XM_008360134.2	AT4G10490	AT4G10490	3.62787
103453940	1039846811	XM_008393536.2	AT4G25490	CBF1	3.66839
103418180	1039916278	XM_008356321.2	AT4G26270	PFK3	3.67142
103429895	1039931958	XM_017330807.1	AT1G73050	At1g73050	3.67497
103420781	1039919603	XM_008358824.2	AT1G21460	SWEET1	3.67721
103444729	1039829709	XM_008383683.2	AT1G34060	AT1G34060	3.69052
103420958	658043167	XM_008358994.1	AT2G18500	OFP7	3.69315
103454840	1039845287	XM_008394435.2	AT4G10490	AT4G10490	3.69891
103421201	1039920116	XM_008359234.2	AT2G26560	PLP2	3.73209
103415737	1039913349	XM_008354032.2	CPC_CUCSACucumberpeelingcupredoxin(CPC	NA	3.74
103408654	1039900734	XM_008347488.2	AT4G10490	AT4G10490	3.78576
103415373	1039912664	XM_008353709.2		GLP6	3.78816
103420080	1039918753	XM_008358141.2	AT4G16260	AT4G16260	3.79048
103453814	1039843309	XM_008393395.2	AT3G22060	AT3G22060	3.79337
103409148	1039901663	XM_008347964.2	AT5G24510	AT5G24510	3.80917
103446097	1039832410	XM_008385156.2		GLP	3.81003
103428484	658058020	XM_008366586.1		NA	3.81517
103453406	1039842023	XM_008392950.2	AT2G38870	AT2G38870	3.82706
103435120	1039878660	XM_008373510.2	AT1G17010	AT1G17010	3.8518
103444963	657980325	XM_008383931.1	AT4G10490	AT4G10490	3.85409
103431585	1039934214	XM_008369751.2	AT2G26560	PLP2	3.8561
103455680	1039845492	XM_008395261.2		GLP6	3.87154
103448503	1039834800	XM_008387761.2	AT3G26310	CYP71B35	3.88167
103438956	1039886696	XM_008377497.2	AT3G57270	GNS	3.88187
103427625	1039929002	XM_008365693.2	AT2G44840	ERF13	3.91804
103421205	1039920119	XM_017328323.1		PLP2	3.92103
103425339	658051823	XM_008363417.1		ATJ20	3.94749
103443287	1039893258	XM_008382107.2	AT1G79670	RFO1	3.96198
103448216	1039835748	XM_017335627.1	AT1G21230	WAK5	3.9845
103422998	1039922685	XM_008361064.2	AT3G26310	CYP71B35	3.98753
103402475	1039849772	XM_008341229.2	AT2G01170	BAT1	3.98969
103448484	1039834927	XM_017335465.1	AT1G11840	GLX1	3.99132
103425577	1039926181	XM_008363666.2	AT1G70170	MMP	4.0075
103408235	1039825657	XM_008347119.2		NA	4.00792
103412438	1039908140	XM_008350998.2	PPO_MALDO Polyphenoloxidase,chloroplastprecursor(EC1.10.3.1	PPO_MALDO	4.01208
103414397	1039910591	XM_008352785.2	AT1G68390	AT1G68390	4.01429
103447903	1039836538	XM_008387117.2		ACA7	4.01732
103404501	1039861806	XM_008343424.2	AT3G02100	AT3G02100	4.04563
103418415	658038395	XM_008356545.1	loc_os08g3766012008.m07751proteinbluecopperproteinprecursor,putative,expressednooriginaldescription'	NA	4.05497
103436348	1039878485	XM_008374768.2	AT2G44450	BGLU15	4.08964
103431261	1039933739	XM_008369397.2		GLP6	4.09112
103440330	1039890927	XM_008379004.2	AT4G34860	A/N-InvB	4.0976
103446096	1039832389	XM_008385155.2		GLP	4.0977
103452204	1039843462	XM_008391728.2	AT1G21270	WAK2	4.10766
103417863	1039915846	XM_008356020.2	AT5G52400	CYP715A1	4.13581
103406377	1039896218	XM_017324439.1	AT2G39490	AT2G39490	4.14596
103446365	1039831146	XM_008385455.2	AT2G39200	MLO12	4.15219
103405545	1039862901	XM_008344559.2	AT5G45890	SAG12	4.18289
103428584	1039930251	XM_008366698.2		NA	4.18549
103434738	1039879209	XM_008373094.2	AT1G16250	AT1G16250	4.18941
103423647	1039923471	XM_017329039.1	AT5G42260	BGLU12	4.1929
103418590	1039916850	XM_008356699.2	AT5G13930	CHS	4.19749
103413950	1039910363	XM_008352383.2	loc_os06g2157012006.m06814proteinmyrosinaseprecursor,putative,expressednooriginaldescription'		4.2062
103413226	1039909307	XM_017326234.1	AT1G67280	AT1G67280	4.22043
103449586	1039841251	XM_008388913.2	AT5G04870	CPK1	4.22436
103435090	1039878436	XM_017332151.1	AT2G29120	GLR2.7	4.24987
103415892	1039913522	XM_008354170.2	AT1G31812	ACBP6	4.2652
103418561	658038659	XM_008356674.1	loc_os10g2805012010.m05688proteinchitinase2,putative,expressednooriginaldescription'	CTL2	4.27291
103435101	657960279	XM_008373493.1	AT1G56580	SVB	4.27291
103424622	1039924889	XM_008362719.2		At5G39150	4.28186
103408934	1039901111	XM_008347748.2	AT2G29120	GLR2.7	4.30126
103424812	1039924945	XM_008362907.2	AT3G47570	AT3G47570	4.33427
103422527	657952700	XM_008360596.1	RUAP_SOYBNRuBisCO-associatedprotein-Glycinemax(Soybean	CHI2L	4.34094
108173809	1039889498	XR_001790597.1	AT2G26560	PLP2	4.34658
103404960	1039861329	XM_008343921.2	AT1G05010	EFE	4.36377
103405792	658015382	XM_008344804.1	AT1G20030	AT1G20030	4.36461
103411893	657950621	XM_008350510.1	loc_os10g2805012010.m05688proteinchitinase2,putative,expressednooriginaldescription'	NA	4.36499
103426173	1039926950	XM_008364262.2	AT1G20030	AT1G20030	4.38032
103442872	1039893410	XM_017334280.1	AT1G21850	sks8	4.38118
103407335	1039898044	XM_008346270.2	AT5G42650	AOS	4.40012
103441505	1039828196	XM_008380187.2	AT4G31940	CYP82C4	4.40717
103403702	664805959	NM_001300878.1	MAL12_MALDOMajorallergenMald1(MaldI	Mald1	4.42925
103403661	658010969	XM_008342502.1	AT5G45890	SAG39-like	4.4338
103429959	1039931957	XM_008368090.2	AT1G73050	AT1G73050	4.46509
103411726	658309445	NM_001293839.1		NA	4.47393
103401323	1039850135	XM_008340036.2		GLX1	4.47864
103452843	1039843577	XM_008392378.2	MAL12_MALDOMajorallergenMald1(MaldI	MAL12_MALDO	4.49457
103416527	1039914311	XM_008354772.2	AT1G70170	MMP	4.49532
103452129	1039866333	XM_008391626.2		NA	4.50252
103456011	1039849220	XM_008395633.2	AT2G46150	AT2G46150	4.51425
103438289	657966712	XM_008376832.1		GLP6	4.53732
103412667	1039908478	XM_008351209.2	AT2G36690	AT2G36690	4.53764
103430059	1039932155	XM_008368189.2	AT4G16260	AT4G16260	4.54721
103410516	1039904187	XM_017325559.1		ACP	4.55
103400870	1039849042	XM_017322745.1	AT5G56960	AT5G56960	4.55337
103431578	1039934181	XM_008369744.2		GLX1	4.56944
103414997	1039870203	XM_008353357.2	AT4G25650	ACD1-LIKE	4.60756
103424764	1039925103	XM_008362861.2	AT5G13930	CHS	4.61144
103426793	1039927810	XM_008364868.2		NA	4.69764
103436625	1039878411	XM_008375070.2	AT2G36690	AT2G36690	4.71555
103450577	1039839851	XM_008389942.2	loc_os05g5030012005.m09099proteinPOLYKETIDESYNTHASEPROTEIN,putative,expressedPRK12476PRK05850PRK05691PRK07769CaiCAMP-bindingPRK09192PRK07768PRK05851AcsEntFFAA1PRK06087PRK08314PRK09274PRK04813nooriginaldescription'	FadD26	4.73434
103408266	1039899989	XM_008347125.2	AT4G11650	OSM34	4.76568
103446094	657982660	XM_008385153.1		GLP2.1	4.77129
103445510	657981469	XM_008384532.1	AT4G27190	AT4G27190	4.79302
103407035	1039897593	XM_008345993.2	AT3G12500	HCHIB	4.79987
103416713	1039914594	XM_008354939.2	AT1G47980	AT1G47980	4.84388
103431434	658063771	XM_008369590.1	AT2G38290	ATAMT2	4.85128
103420662	1039919479	XM_008358713.2	AT1G08440	AT1G08440	4.8838
103455731	1039867717	XM_008395323.2	AT3G12500	CHT-2	4.96162
103451242	1039840379	XM_008390670.2	AT2G40740	WRKY55	4.97159
103440276	1039889419	XM_008378949.2		GLX1	5.01305
103410426	1039904146	XM_008349129.2		GLX1	5.02638
103426298	658053709	XM_008364388.1	AT3G55100	ABCG17.2	5.02773
103418662	1039916941	XM_008356771.2	AT5G06720	PA2	5.04831
103418282	658038150	XM_008356417.1	AT5G55050	AT5G55050	5.04983
103448535	1039838049	XM_008387800.2	AT1G52800	AOP3	5.08981
103410295	1039903912	XM_008349010.2	AT1G21460	SWEET1	5.09883
103420898	1039919725	XM_017328233.1	AT1G75620	AT1G75620	5.11186
103432488	1039874620	XM_008370692.2	AT5G62000	ARF2	5.12294
103420384	1039919092	XM_008358448.2	AT1G79990	AT1G79990	5.21865
103417335	1039915261	XM_008355528.2	AT5G45890	SAG12	5.2427
103400169	1039850765	XM_008338840.2	AT2G26560	PLP2	5.26572
103423157	1039873749	XM_008361230.2		ACA7	5.27983
103410386	658023830	XM_008349091.1		At1g64065	5.34769
103417342	1039915320	XM_008355534.2	AT5G48930	HAST	5.35649
103428516	1039930141	XM_008366618.2	AT5G54160	OMT1	5.38506
103446762	659066179	NM_001294118.1	AT1G05010	EFE	5.39577
103453193	1039843672	XM_008392743.2	AT1G47480	AT1G47480	5.42497
103430711	1039932935	XM_008368860.2	AT5G61820	AT5G61820	5.45976
103444148	1039895208	XM_008383063.2	AT1G20030	AT1G20030	5.52275
103454938	1039846403	XM_008394529.2	AT5G61820	AT5G61820	5.52772
103403474	1039854913	XM_008342322.2	AT4G17260	AT4G17260	5.58637
103413073	1039909169	XM_008351564.2		PDR2	5.60484
103429376	1039931260	XM_008367529.2	AT1G20030	AT1G20030	5.6126
103407511	1039898436	XM_017324737.1	AT5G13930	CHS	5.6628
103438321	1039882156	XM_008376870.2	AT1G31690	AT1G31690	5.73682
103414362	1039910477	XM_008352756.2	AT1G14550	AT1G14550	5.83344
103411735	1039906845	XM_008350366.2	AT1G20030	AT1G20030	5.85416
103420796	1039871112	XM_008358838.2	AT1G73050	AT1G73050	5.86706
103437972	1039881562	XM_017332667.1	AT5G13210	AT5G13210	5.89156
103443856	1039893632	XM_017334369.1	AT5G55050	GDSL	5.89894
103409318	1039902039	XM_008348127.2		PR1	5.98458
103419198	1039917635	XM_008357314.2	AT3G54420	CHIB	6.01748
103453371	1039843625	XM_008392915.2	AT3G62020	GLP7	6.04424
108172251	1039926027	XM_017329601.1	AT2G26710	BAS1	6.06732
103409894	1039903072	XM_017325414.1	AT1G31710	AT1G31710	6.1013
103403467	1039856970	XM_008342315.2	AT1G59960	AT1G59960	6.20712
103430383	1039932593	XM_017330955.1		At2g29290	6.21369
103438049	1039881299	XM_008376585.2	AT1G15125	AT1G15125	6.27569
103453966	657998732	XM_008393558.1	AT3G17675	SLP1	6.29171
103427717	658056514	XM_008365791.1	AT1G27040	AT1G27040	6.3216
103402179	1039852835	XM_008340918.2	AT1G78780	AT1G78780	6.42196
103440144	657970551	XM_008378810.1	AT5G43370	APT1	6.53985
103431506	1039934107	XM_008369666.2	AT3G54420	EP3	6.59735
103414711	658031637	XM_008353077.1	AT1G02335	GLP9	6.60847
103414363	1039910679	XM_008352757.2	AT1G14550	AT1G14550	6.61033
103454774	658000298	XM_008394376.1	AT2G25940	ALPHA-VPE	6.99966
103455021	1039845818	XM_008394614.2	AT5G13930	CHS	7.01863
103453251	1039866094	XM_017336913.1		NA	7.06158
103406639	658016984	XM_008345626.1	AT5G43370	APT1	7.14992
103415037	658032243	XM_008353400.1	AT1G04110	SBT1.3	7.16516
103405895	658015593	XM_008344919.1	AT1G78380	GSTU19	7.20628
108169585	1039850641	XM_017323086.1	AT1G69680	AT1G69680	7.32071
103403490	1039859269	XM_008342335.2	AT1G59960	AT1G59960	7.36351
103406936	1039897418	XM_008345901.2	AT5G56960	AT5G56960	7.49266
103452112	657947450	XM_008391602.1	AT2G25060	ENODL14	7.55154
103400961	1039850322	XM_008339660.2	AT1G19250	FMO1	7.62701
103444789	1039831325	XM_017334893.1	AT1G04110	SDD1	7.76232
103419753	1039918309	XM_008357847.2	AT1G17020	SRG1	7.86265
103408983	1039901299	XM_017325148.1		At5g38940	8.10291
103455997	658002684	XM_008395618.1	AT3G63470	SCPL3	8.32459
103435122	1039878661	XM_017332208.1		NA	8.72462
103407103	1039897755	XM_008346053.2	AT1G06620	ACO	8.83054
103429951	1039931946	XM_008368081.2	AT1G52800	AOP3	8.97228
103435195	1039878070	XM_008373590.2	AT5G38940	AT5G38940	10.0681

## Sheet: M9 output
KEGG output for M9
Kegg_ID	Pathway	Number of genes M9
mdm00010	Glycolysis / Gluconeogenesis	4
mdm00020	Citrate cycle (TCA cycle)	5
mdm00030	Pentose phosphate pathway	2
mdm00040	Pentose and glucuronate interconversions	2
mdm00051	Fructose and mannose metabolism	1
mdm00052	Galactose metabolism	2
mdm00053	Ascorbate and aldarate metabolism	4
mdm00061	Fatty acid biosynthesis	1
mdm00062	Fatty acid elongation	1
mdm00071	Fatty acid degradation	3
mdm00100	Steroid biosynthesis	4
mdm00130	Ubiquinone and other terpenoid	2
mdm00220	Arginine biosynthesis	4
mdm00230	Purine metabolism	1
mdm00240	Pyrimidine metabolism	2
mdm00250	Alanine, aspartate and glutamate metabolism	5
mdm00260	Glycine, serine and threonine metabolism	3
mdm00270	Cysteine and methionine metabolism	13
mdm00280	Valine, leucine and isoleucine degradation	5
mdm00290	Valine, leucine and isoleucine biosynthesis	1
mdm00310	Lysine degradation	3
mdm00330	Arginine and proline metabolism	3
mdm00340	Histidine metabolism	1
mdm00350	Tyrosine metabolism	6
mdm00360	Phenylalanine metabolism	7
mdm00380	Tryptophan metabolism	9
mdm00400	Phenylalanine, tyrosine and tryptophan biosynthesis	5
mdm00410	beta-Alanine metabolism	3
mdm00450	Seleno compound metabolism	1
mdm00460	Cyanoamino acid metabolism	4
mdm00480	Glutathione metabolism	9
mdm00500	Starch and sucrose metabolism	5
mdm00513	Various types of N-glycan biosynthesis	1
mdm00520	Amino sugar and nucleotide sugar metabolism	3
mdm00531	Glycosaminoglycan degradation	1
mdm00561	Glycerolipid metabolism	4
mdm00562	Inositol phosphate metabolism	1
mdm00564	Glycerophospholipid metabolism	8
mdm00565	Ether lipid metabolism	2
mdm00591	Linoleic acid metabolism	2
mdm00592	alpha-Linolenic acid metabolism	6
mdm00620	Pyruvate metabolism	8
mdm00630	Glyoxylate and dicarboxylate metabolism	5
mdm00640	Propanoate metabolism	2
mdm00650	Butanoate metabolism	2
mdm00710	Carbon fixation in photosynthetic organisms	3
mdm00740	Riboflavin metabolism	1
mdm00750	Vitamin B6 metabolism	2
mdm00760	Nicotinate and nicotinamide metabolism	1
mdm00770	Pantothenate and CoA biosynthesis	3
mdm00790	Folate biosynthesis	2
mdm00860	Porphyrin metabolism	1
mdm00900	Terpenoid backbone biosynthesis	8
mdm00903	Limonene and pinene degradation	1
mdm00904	Diterpenoid biosynthesis	4
mdm00906	Carotenoid biosynthesis	1
mdm00908	Zeatin biosynthesis	4
mdm00909	Sesquiterpenoid and triterpenoid biosynthesis	4
mdm00910	Nitrogen metabolism	6
mdm00940	Phenylpropanoid biosynthesis	22
mdm00941	Flavonoid biosynthesis	3
mdm00945	Stilbenoid, diarylheptanoid and gingerol biosynthesis	3
mdm00950	Isoquinoline alkaloid biosynthesis	6
mdm00960	Tropane, piperidine and pyridine alkaloid biosynthesis	6
mdm00966	Glucosinolate biosynthesis	1
mdm00999	Biosynthesis of various plant secondary metabolites	4
mdm01040	Biosynthesis of unsaturated fatty acids	1
mdm01100	Metabolic pathways	126
mdm01110	Biosynthesis of secondary metabolites	102
mdm01200	Carbon metabolism	10
mdm01210	2-Oxocarboxylic acid metabolism	2
mdm01212	Fatty acid metabolism	3
mdm01230	Biosynthesis of amino acids	11
mdm01240	Biosynthesis of cofactors	15
mdm02010	ABC transporters	3
mdm03010	Ribosome	3
mdm03022	Basal transcription factors	1
mdm04016	MAPK signaling pathway	11
mdm04070	Phosphatidylinositol signaling system	4
mdm04075	Plant hormone signal transduction	9
mdm04120	Ubiquitin mediated proteolysis	1
mdm04122	Sulfur relay system	1
mdm04130	SNARE interactions in vesicular transport	2
mdm04141	Protein processing in endoplasmic reticulum	1
mdm04144	Endocytosis	1
mdm04146	Peroxisome	6
mdm04626	Plant-pathogen interaction	10
